# Supplementary material
Source: PubMed Central journal article supplement (PMC3292631)

**Supporting Information**

**Stereoselective Synthesis of Both Tetrahydropyran Rings of Antitumor  
Macrolide, (-)-Lasonolide A**

Arun K. Ghosh\* and Guo-Bao Ren

*Department of Chemistry and Department of Medicinal Chemistry,  
Purdue University, West Lafayette, Indiana, 47907*

[akghosh@purdue.edu](mailto:akghosh@purdue.edu)

Table of Contents

General experimental methods.....S-2

<sup>1</sup>H-NMR and <sup>13</sup>C-NMR Spectra.....S-3 to S-30

(All spectra of the new compounds are arranged in the order of their appearance in the manuscript)

## General experimental methods

All moisture sensitive reactions were carried out in flame dried flask under nitrogen or argon atmosphere. Anhydrous solvents were obtained as follows: THF, DME, diethyl ether and toluene by distillation from sodium and benzophenone; dichloromethane, pyridine, acetonitrile and triethylamine from CaH<sub>2</sub>. All other solvents were HPLC grade. Column chromatography was performed with 240-400 mesh silica gel under low pressure of 5-10 psi. TLC was carried out with silica gel 60-F-254 plates visualized under UV light and stained with either phosphomolybdic acid or acidic *p*-anisaldehyde. <sup>1</sup>H NMR spectra were recorded at 300, 400 or 500 MHz with chemical shifts reported in ppm (δ). <sup>13</sup>C NMR spectra were recorded at 75, 100 or 125 MHz with chemical shifts reported in ppm (δ). Infrared spectra were recorded as thin films on NaCl plates on a Fourier transform spectrometer. Optical rotations were measured using a sodium (589, D line) lamp polarimeter. Mass spectra were obtained at the Purdue University Campus-wide Mass Spectrometry Center facility.



rgb-3-27-cl3  
Cl3 standard parameters, CDCl3, QNP probe.

100 MHz, CDCl3

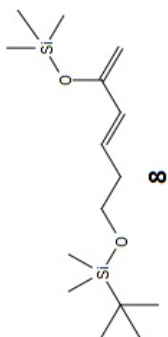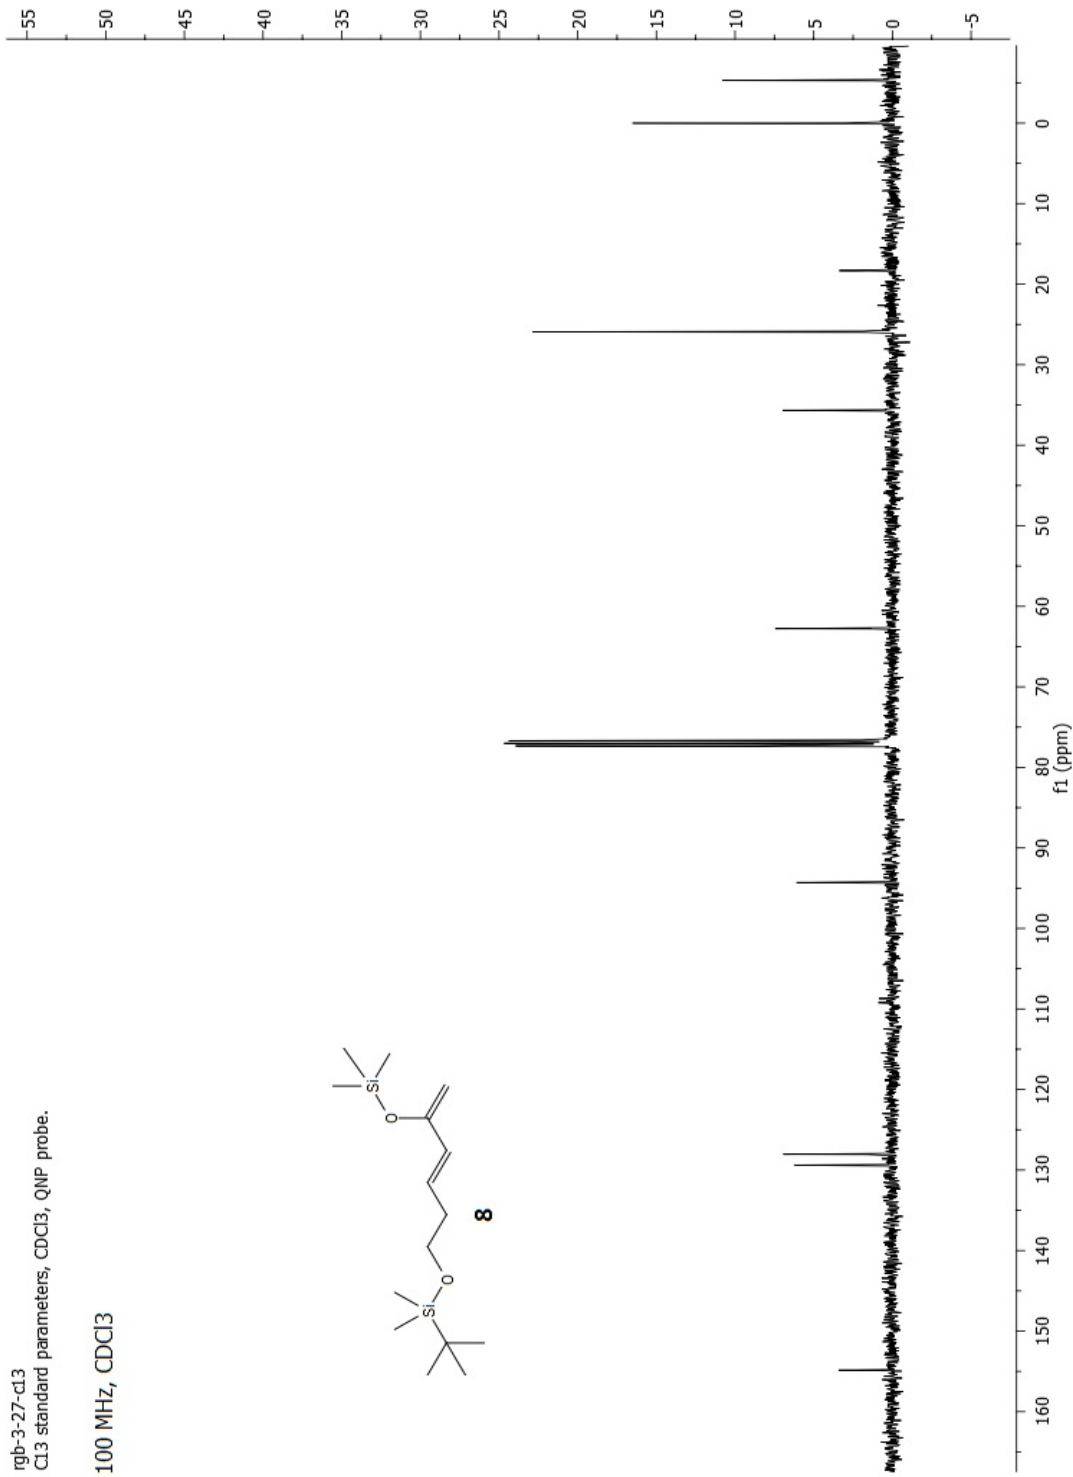



rgb-2-83-cl3  
Cl3 standard parameters, CDCl3, QNP probe.

100 MHz, CDCl3

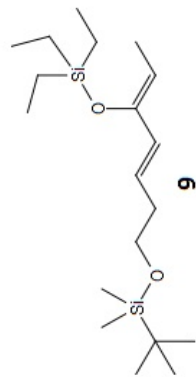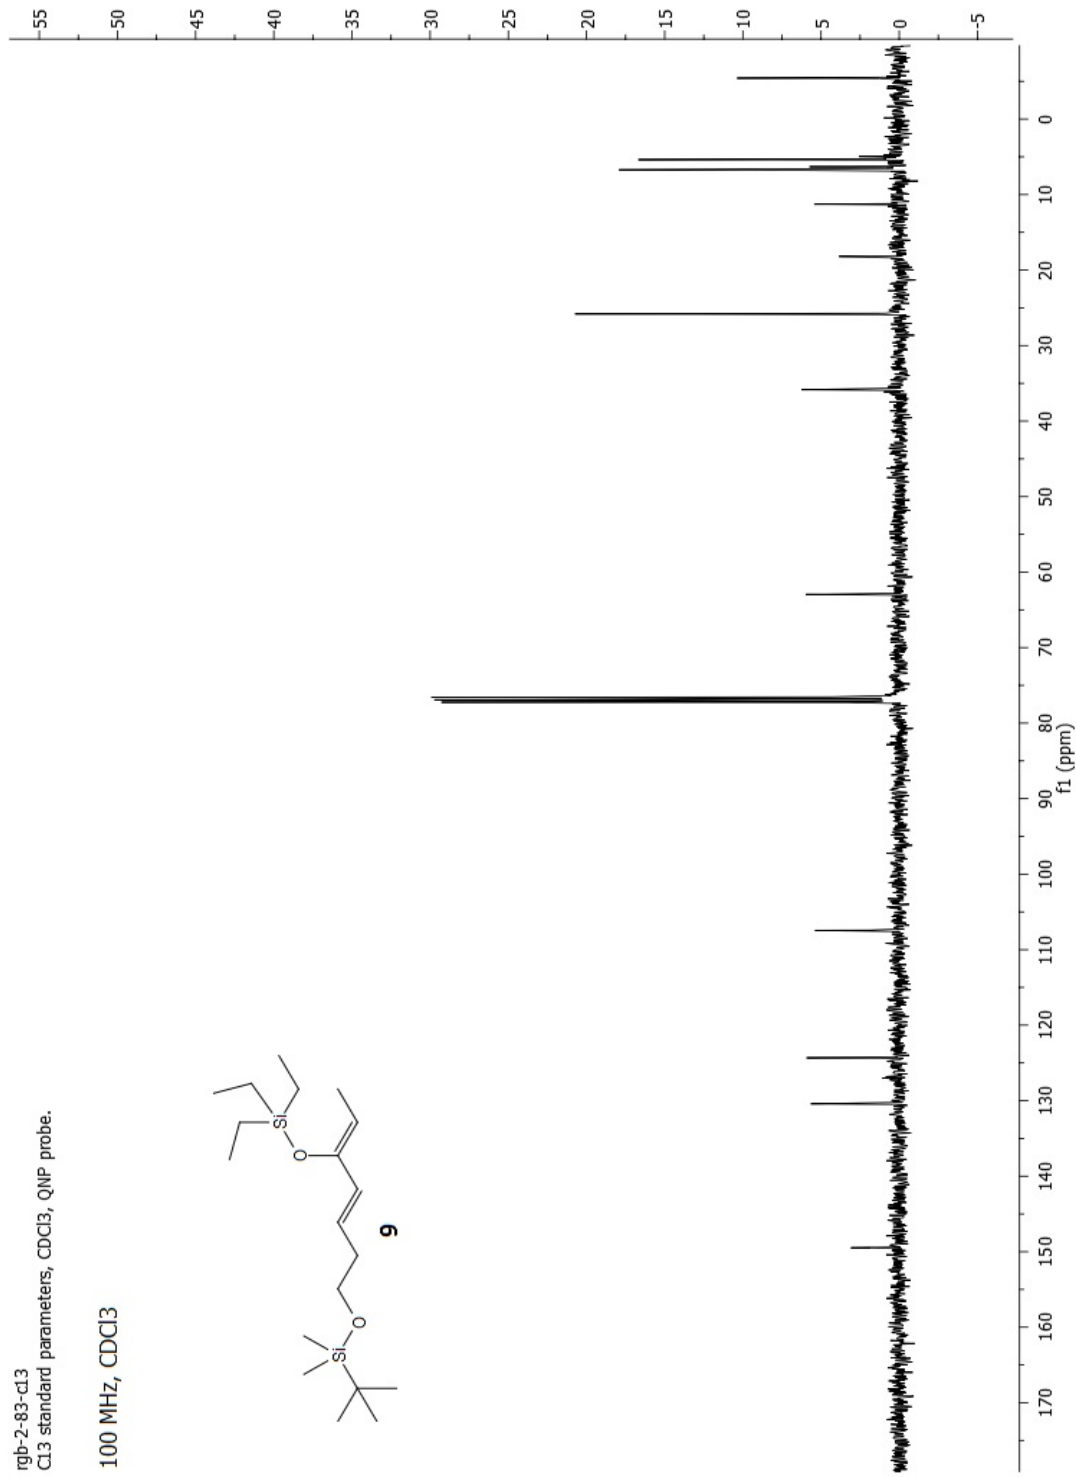

rgb-3-112-h1  
H1 standard parameters, CDCl3, QNP probe.

400 MHz, CDCl3

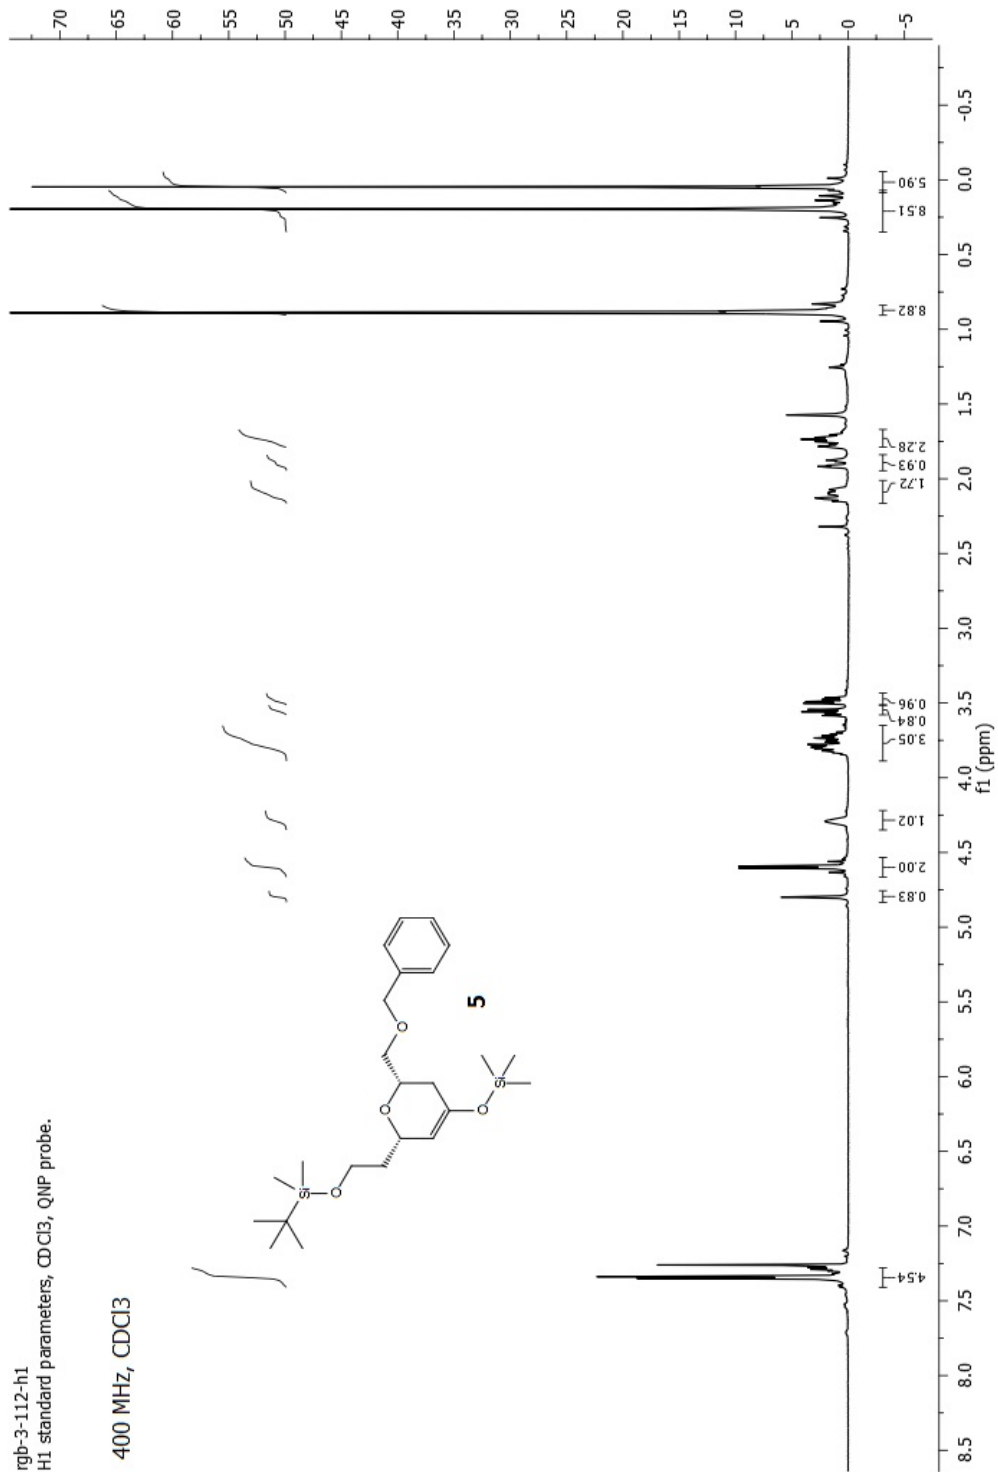

rgb-3-112-cl3  
Cl3 standard parameters, CDCl3, QNP probe.

100 MHz, CDCl3

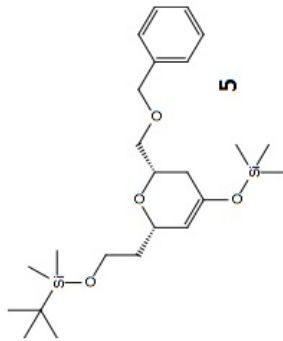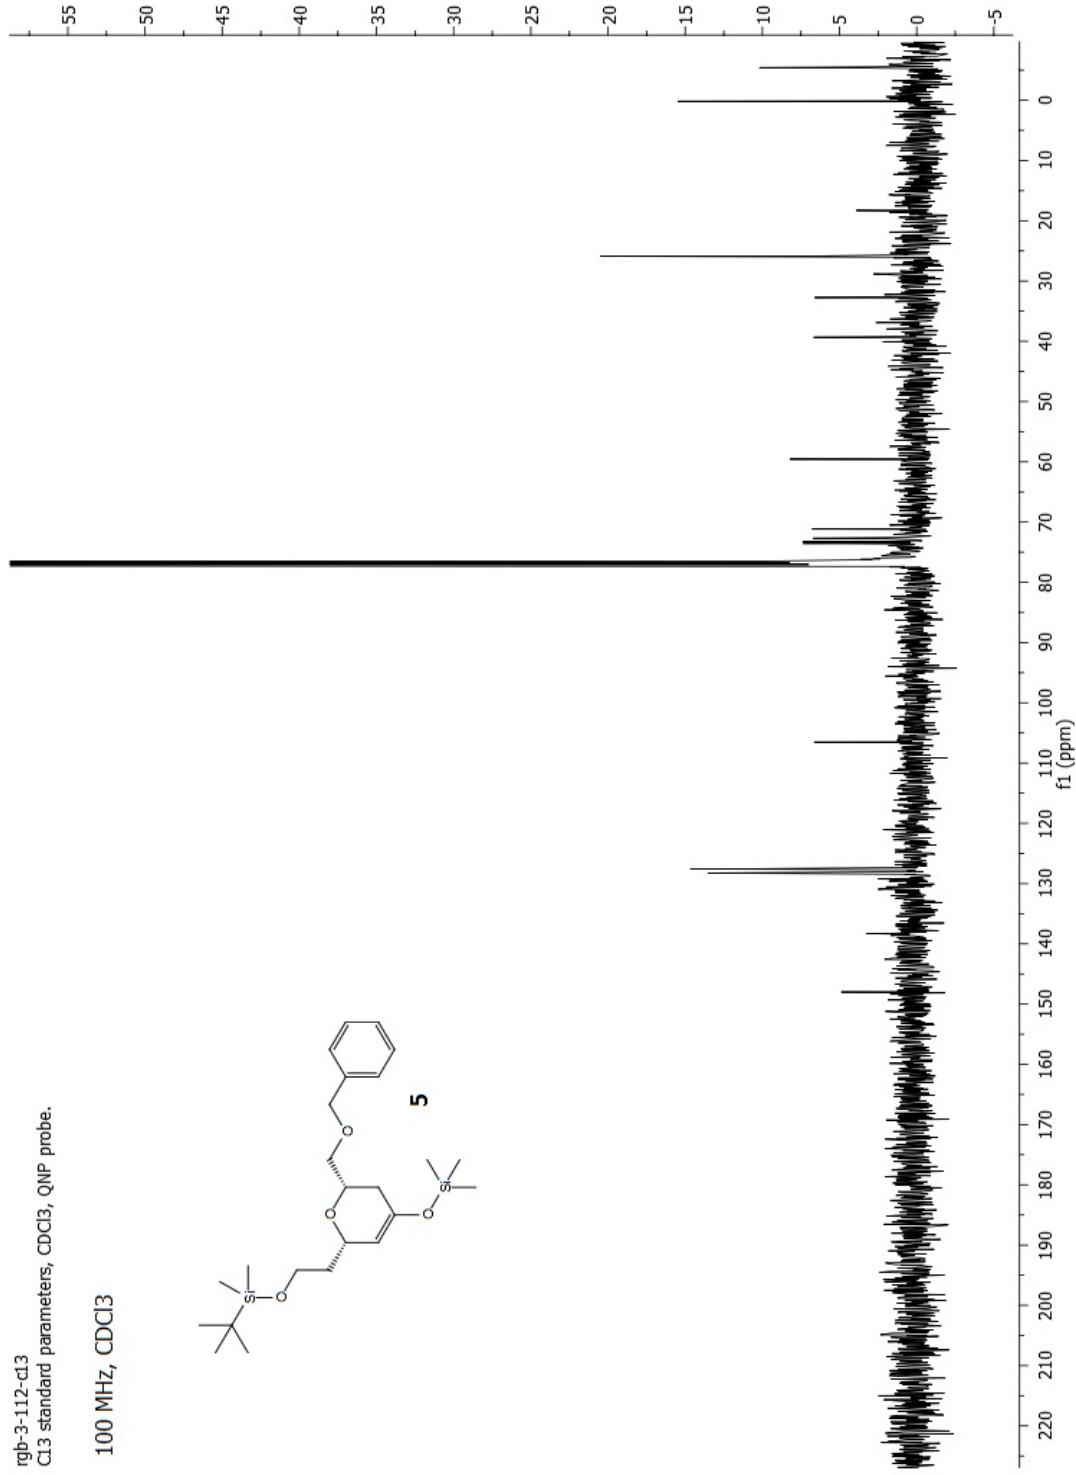



rgb-2-86-h1  
H1 standard parameters, CDCl3

300 MHz, CDCl3

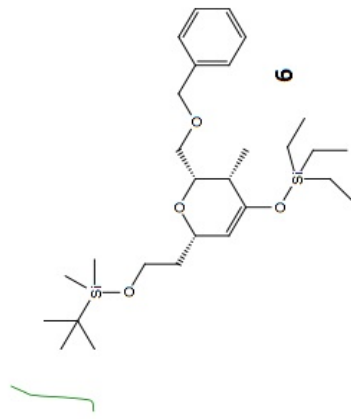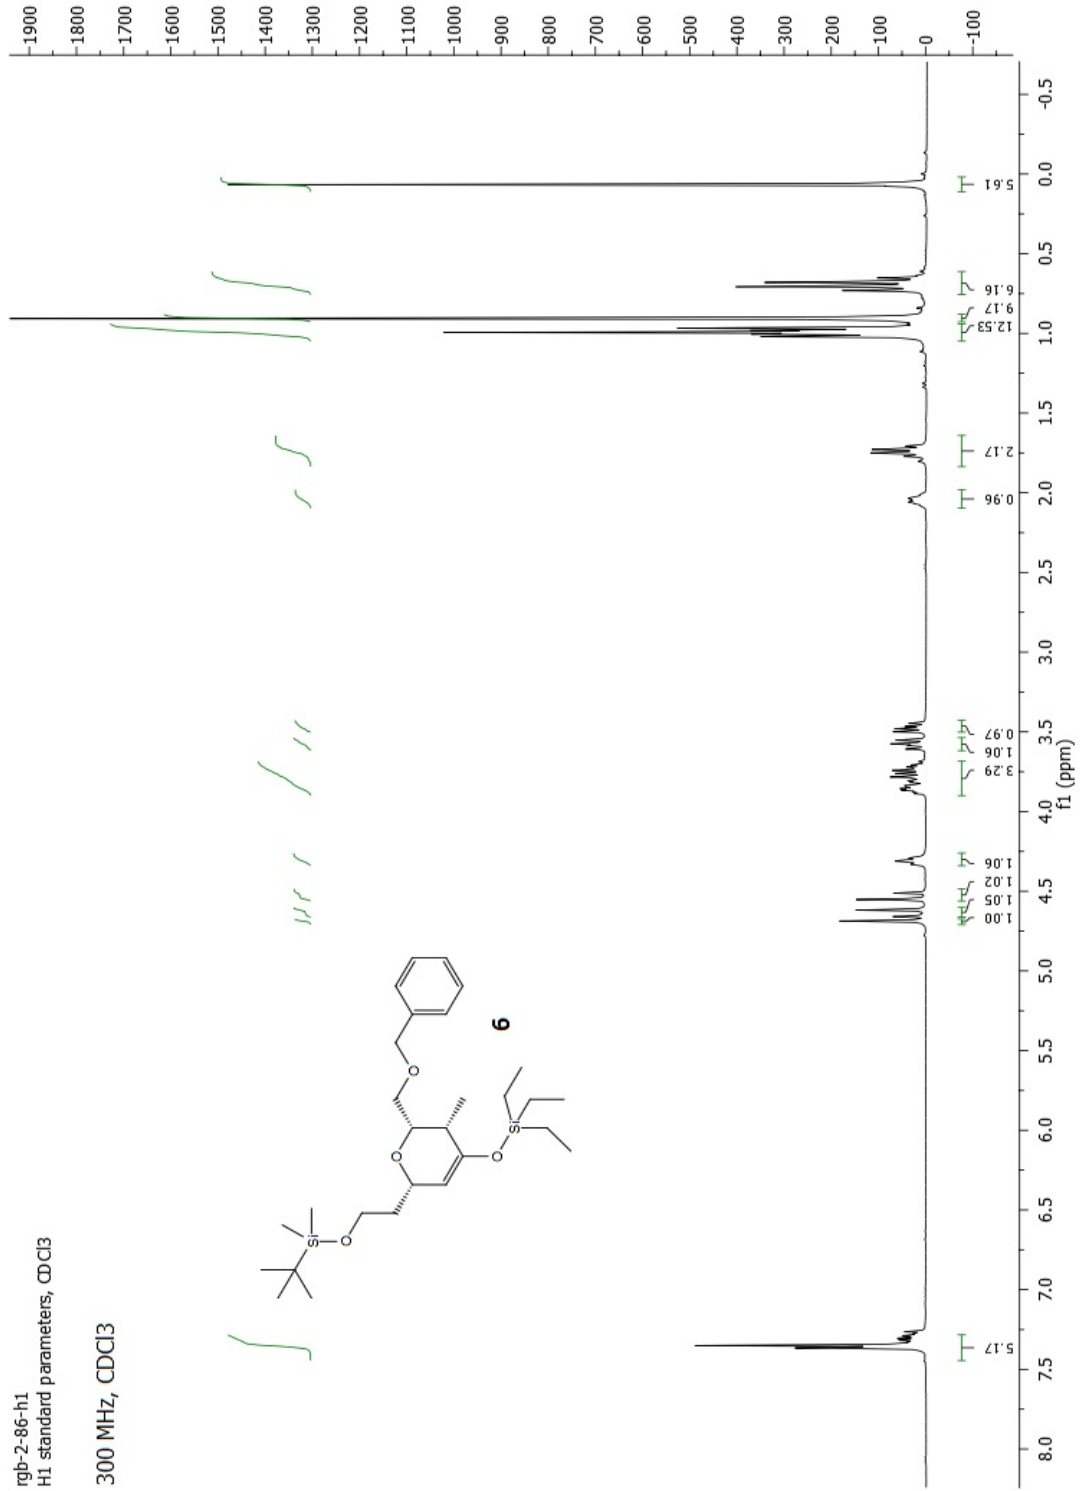

rgb-2-86-cl3-2  
Cl3 standard parameters, CDCl3

75 MHz, CDCl3

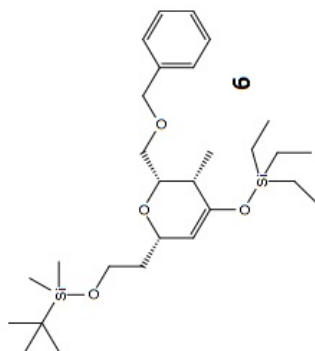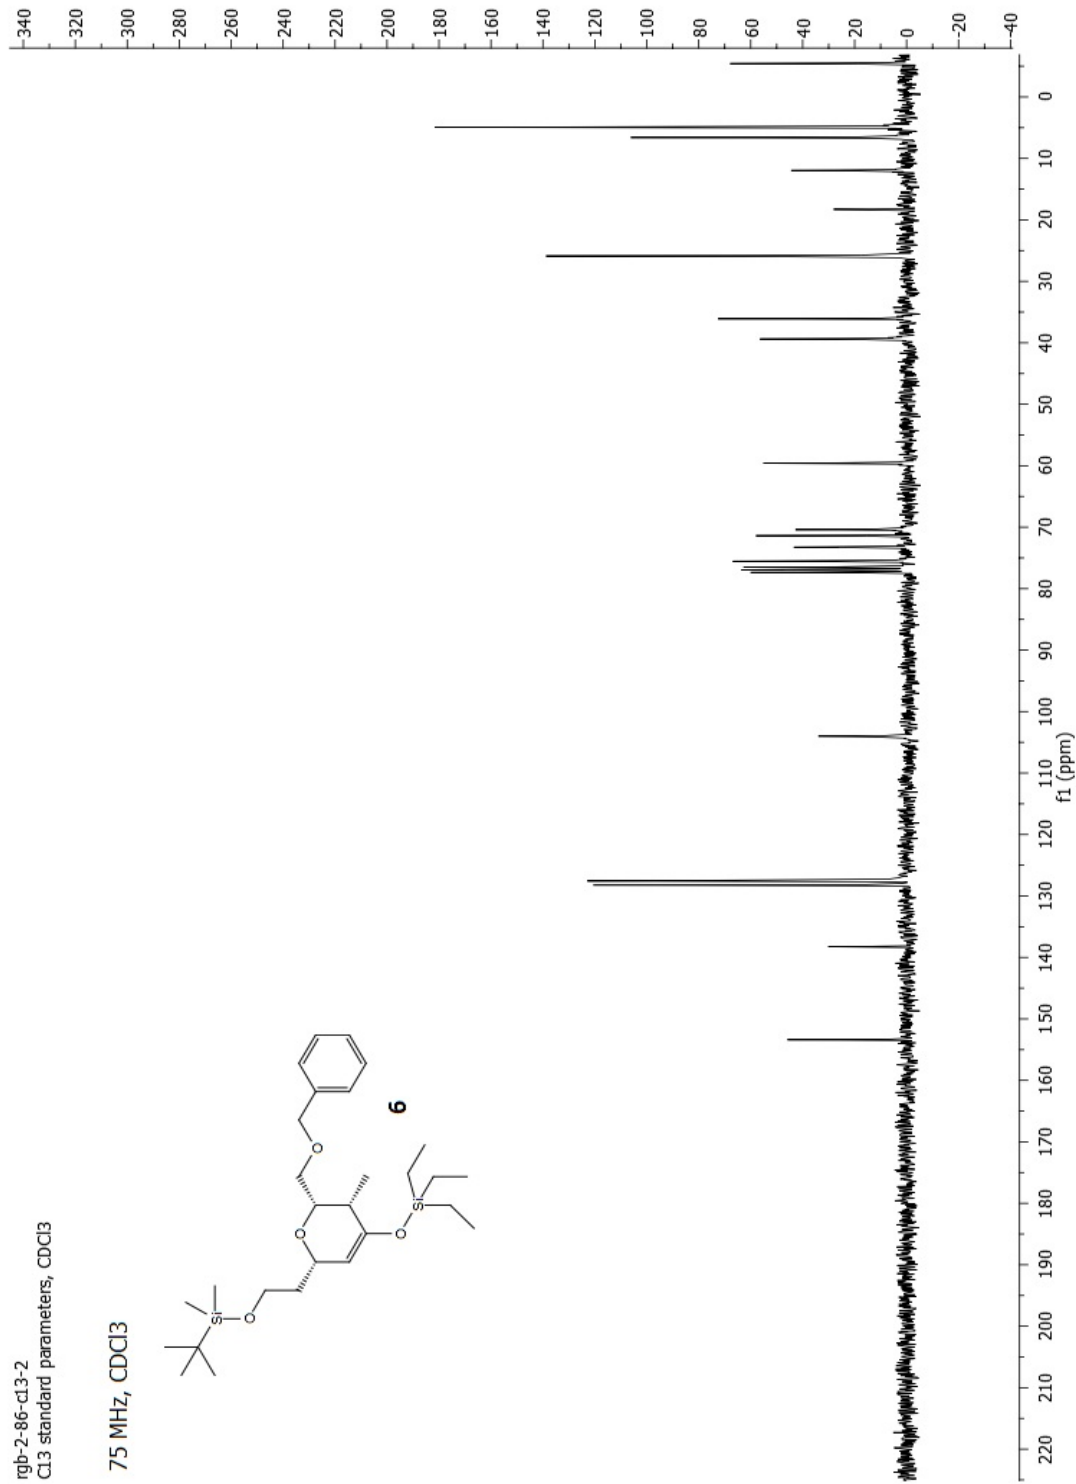

rgb-3-129-2-h1  
H1 standard parameters, CDCl3, QNP probe.

400 MHz, CDCl3

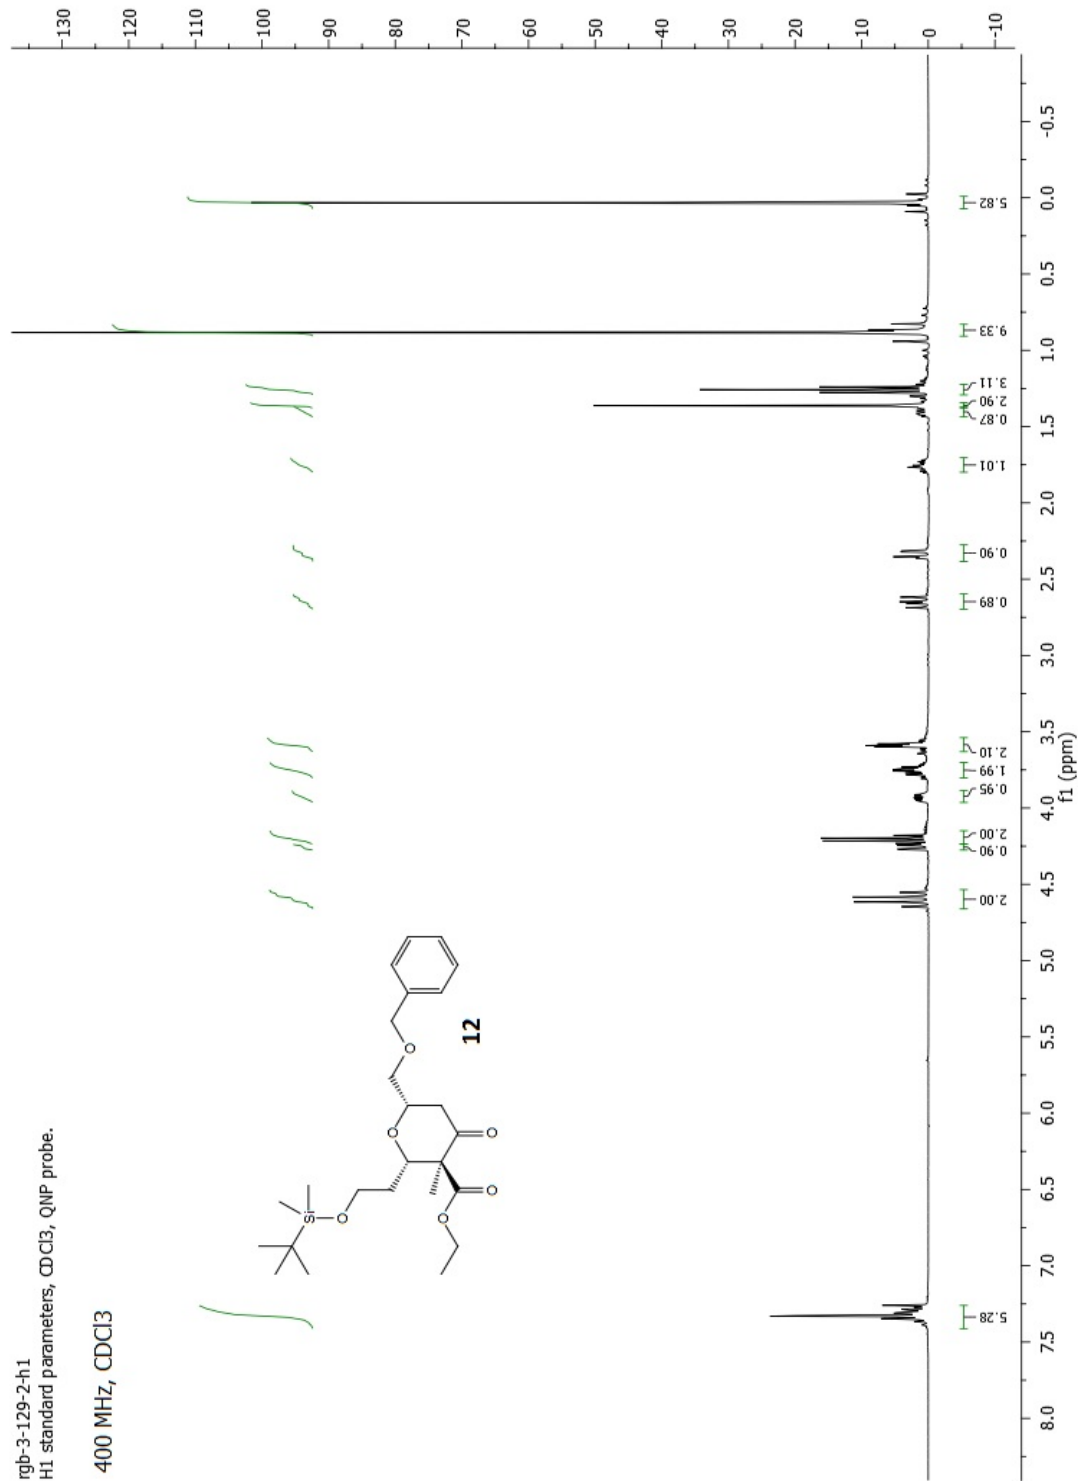

rgb-3-129-2-c1  
Cl3 standard parameters, CDCl3, QNP probe.

100 MHz, CDCl3

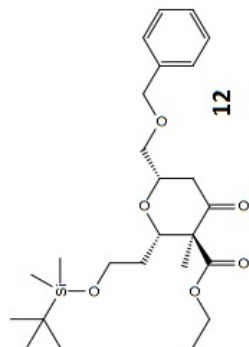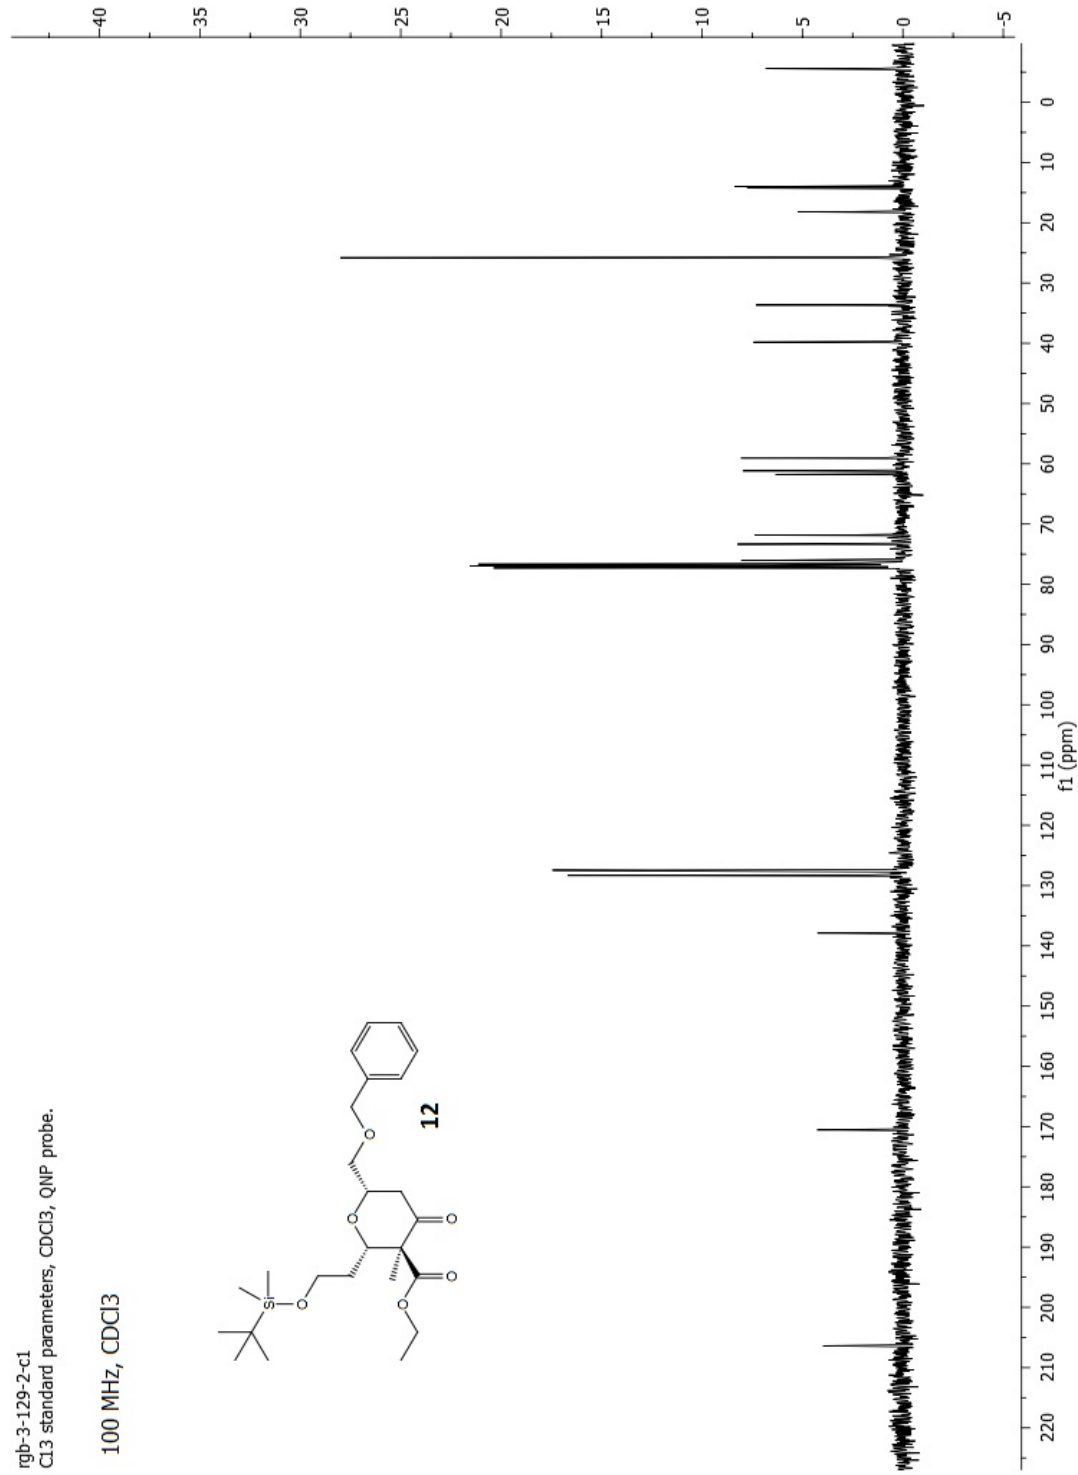

rgb-3-130-h1  
H1 standard parameters, CDCl3, QNP probe.

400 MHz, CDCl3

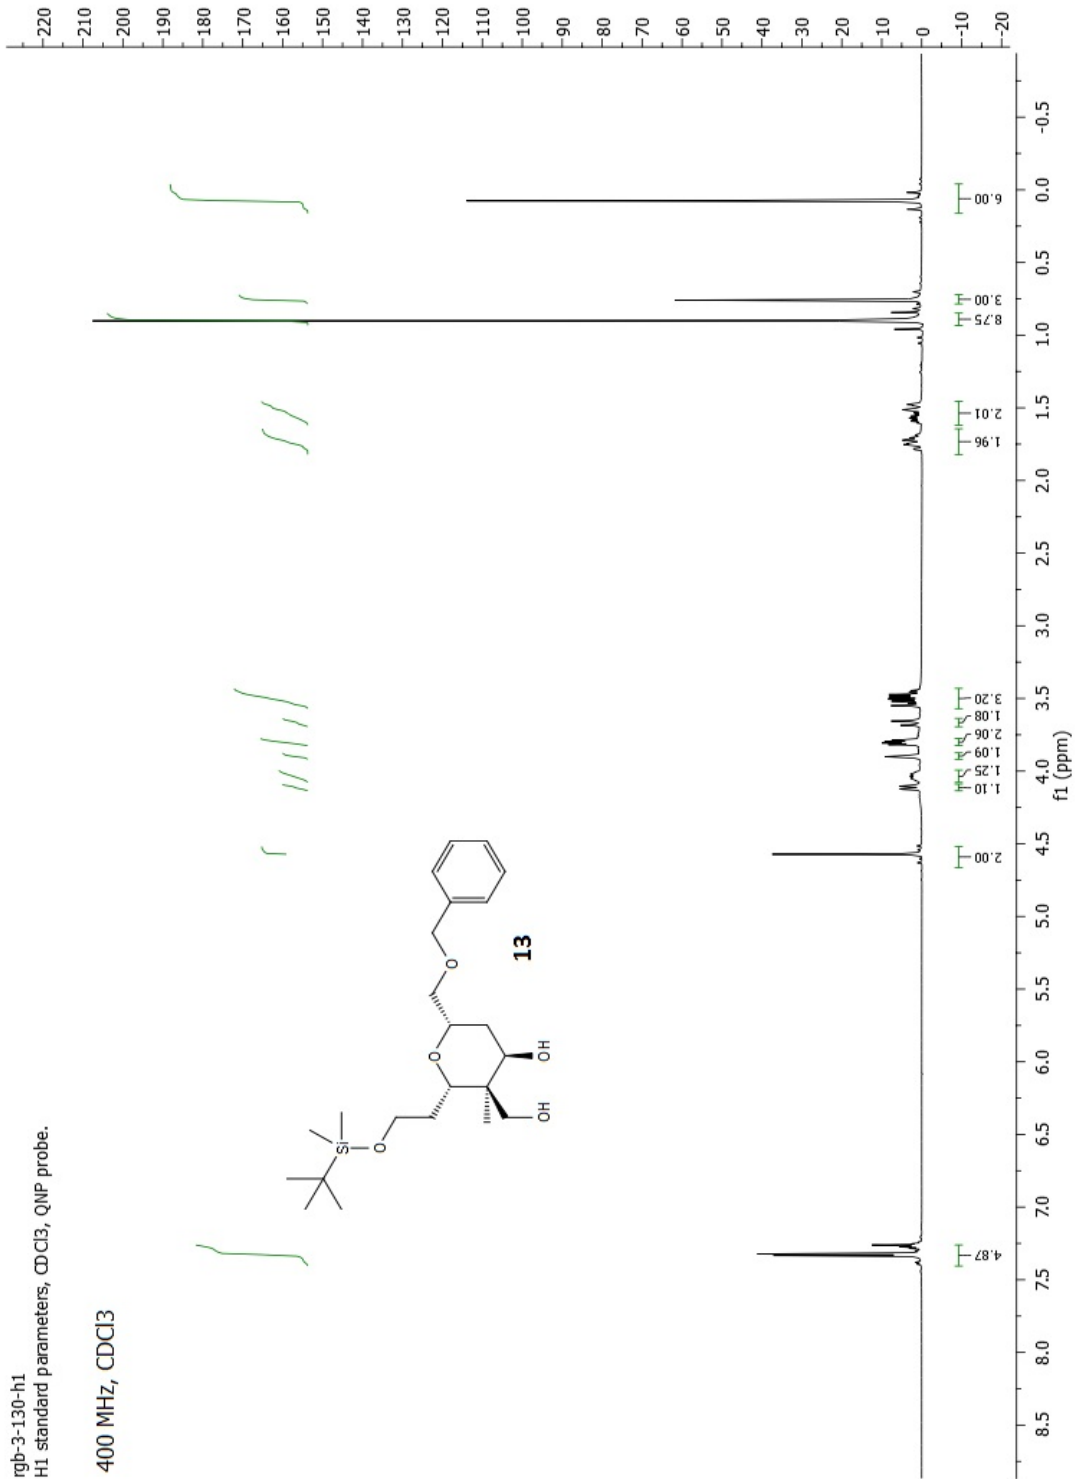

rgb-3-130-cl3  
Cl3 standard parameters, CDCl3, QNP probe.

100 MHz, CDCl3

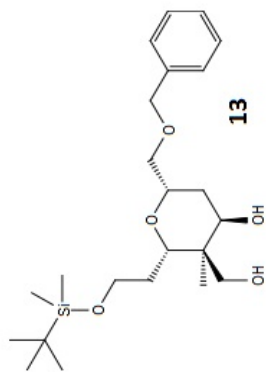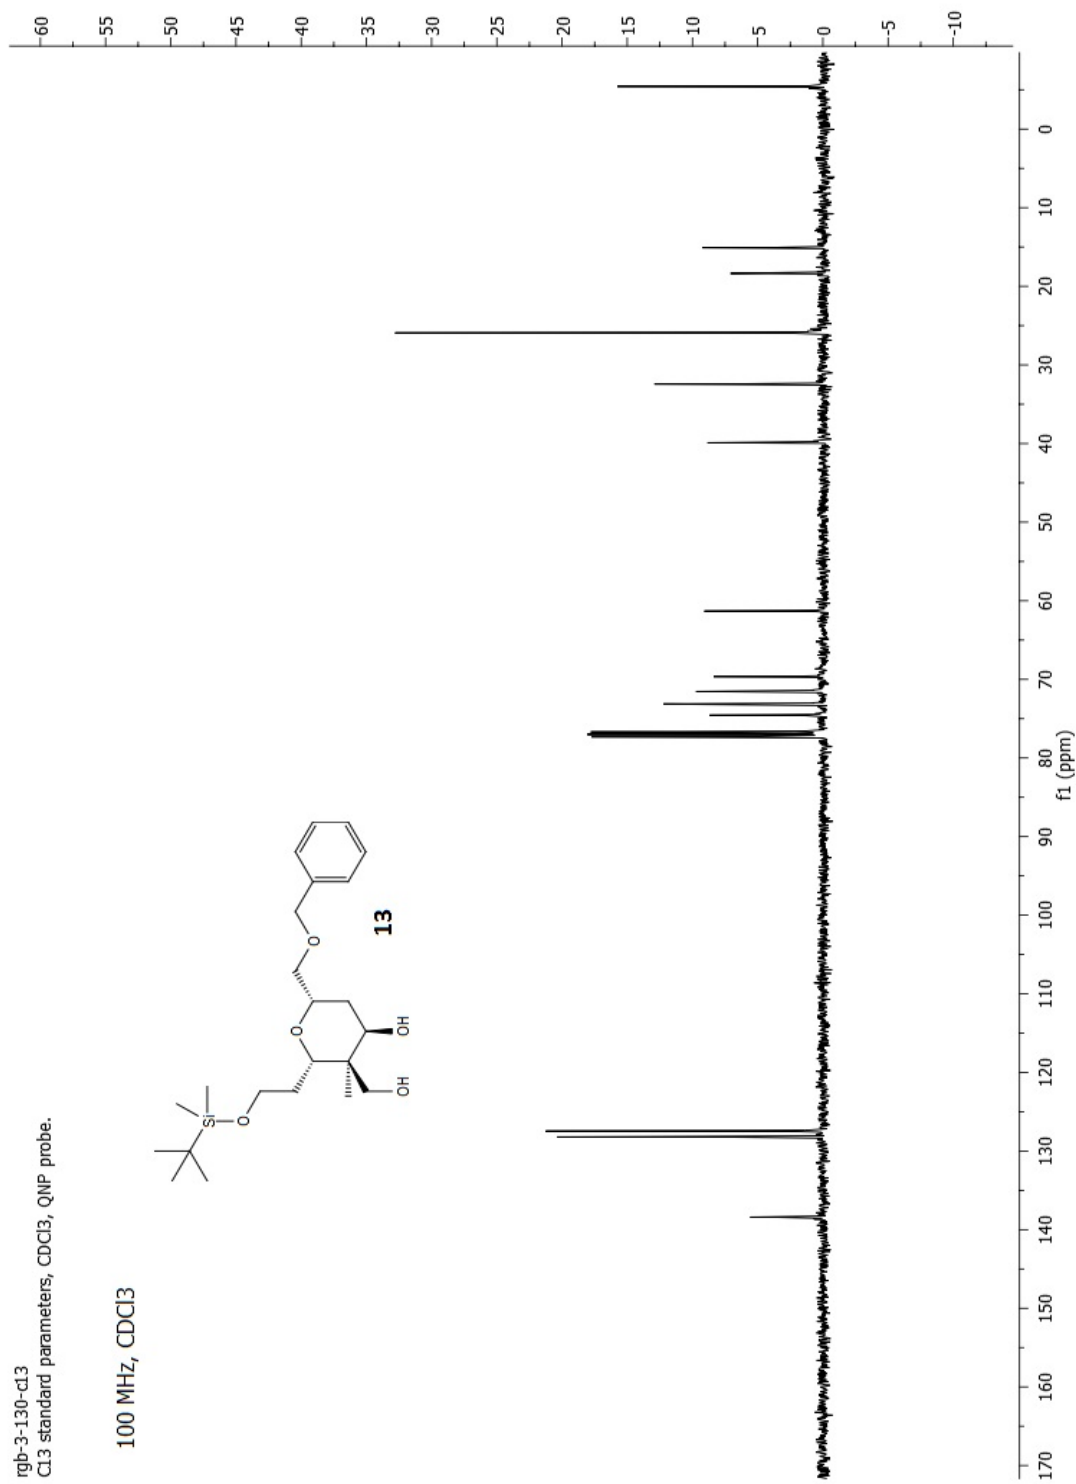

rgb-3-45-h1  
H1 standard parameters, CDCl<sub>3</sub>, QNP probe.

400 MHz, CDCl<sub>3</sub>

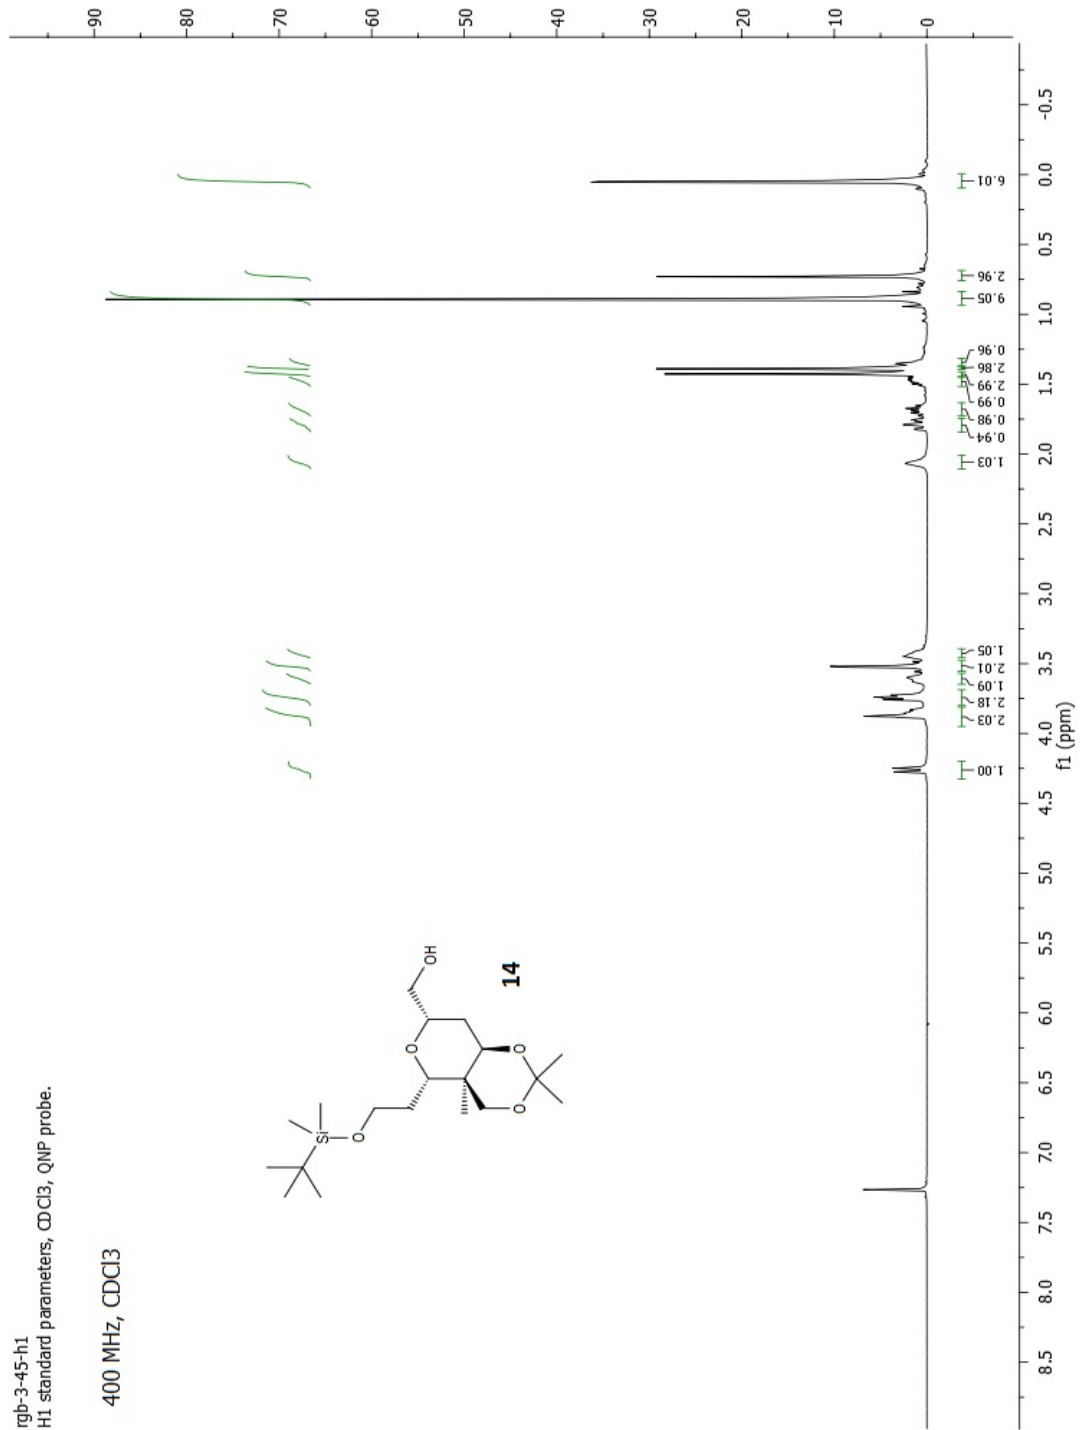

rgb-3-45-cl3  
Cl3 standard parameters, CDCl3, QNP probe.

100 MHz, CDCl3

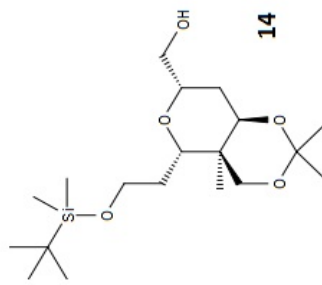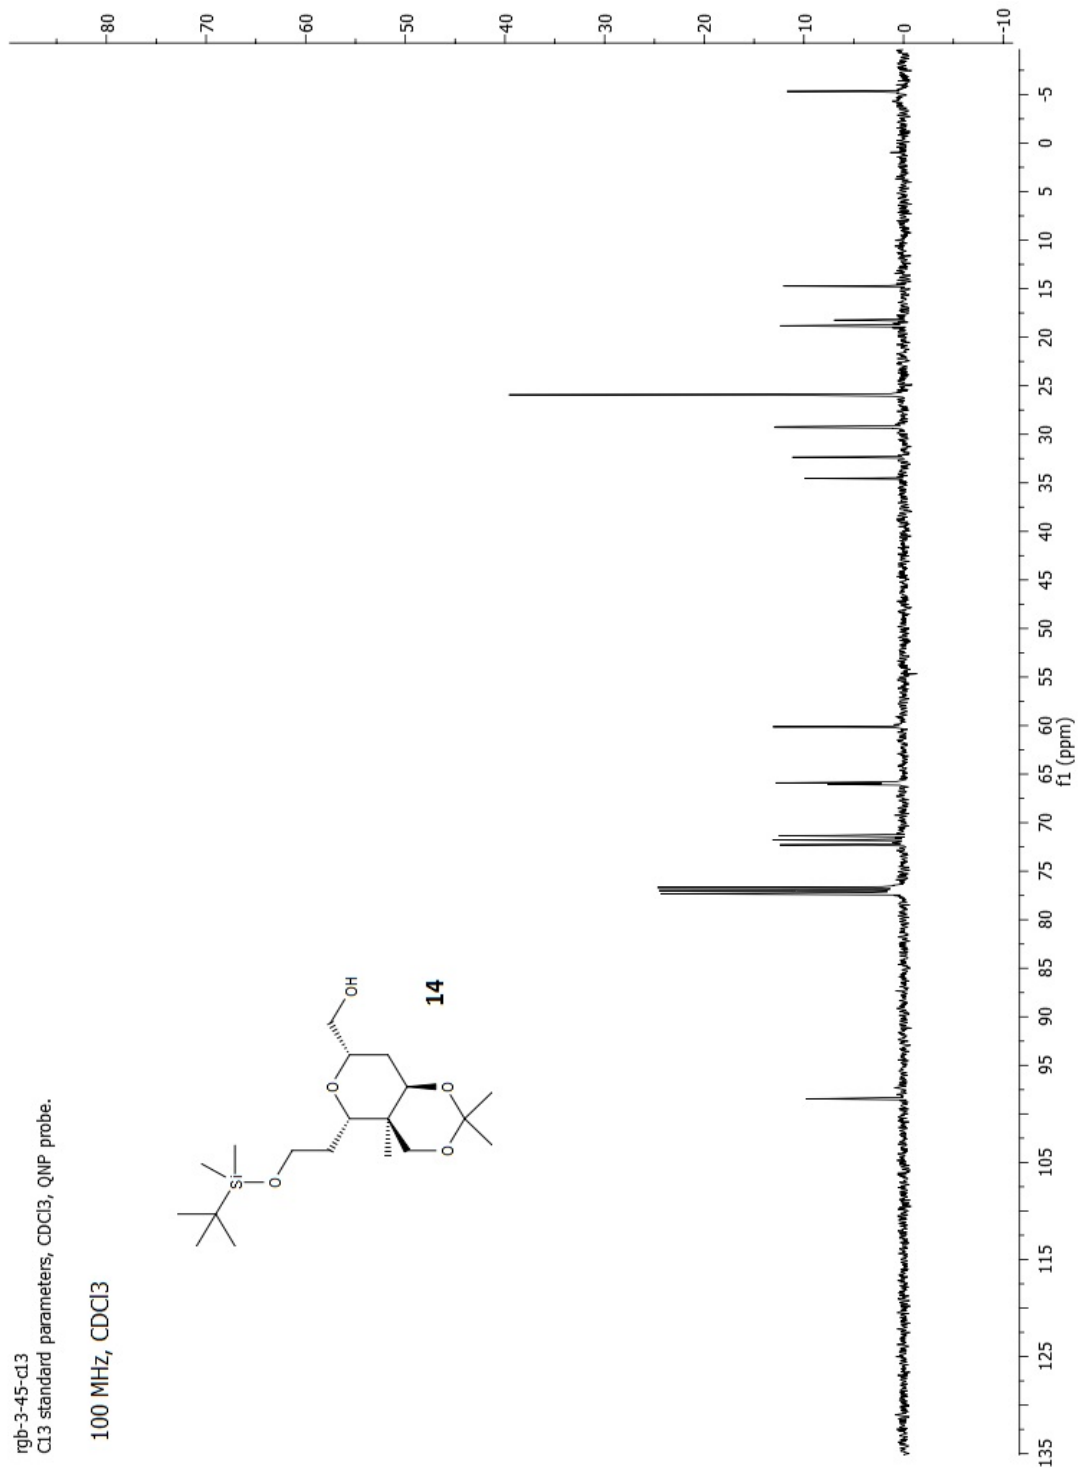



mqb-3-57-h1  
H1 standard parameters, CDCl3, QNP probe.

400 MHz CDCl3

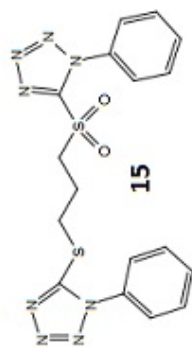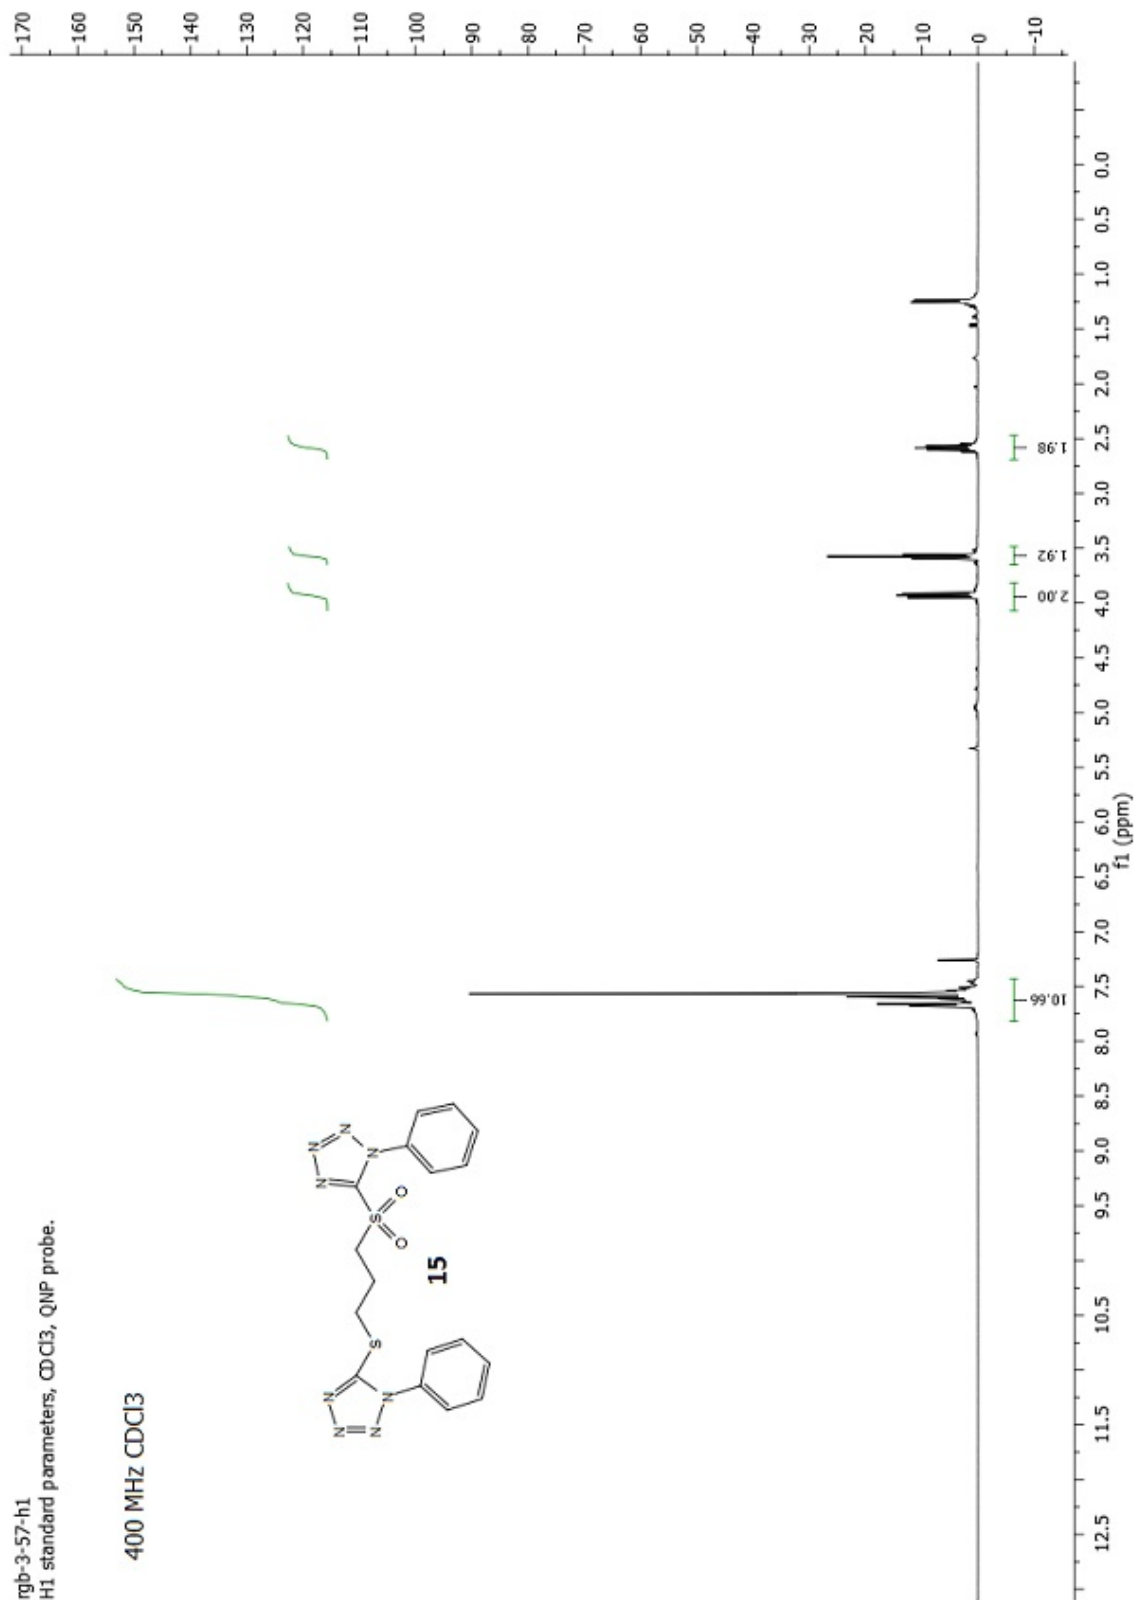

mgb-3-57-cl3  
Cl3 standard parameters, CDCl3, QNP probe.

100 MHz CDCl3

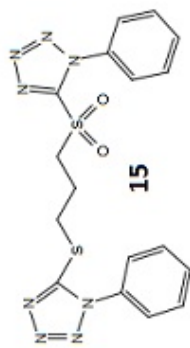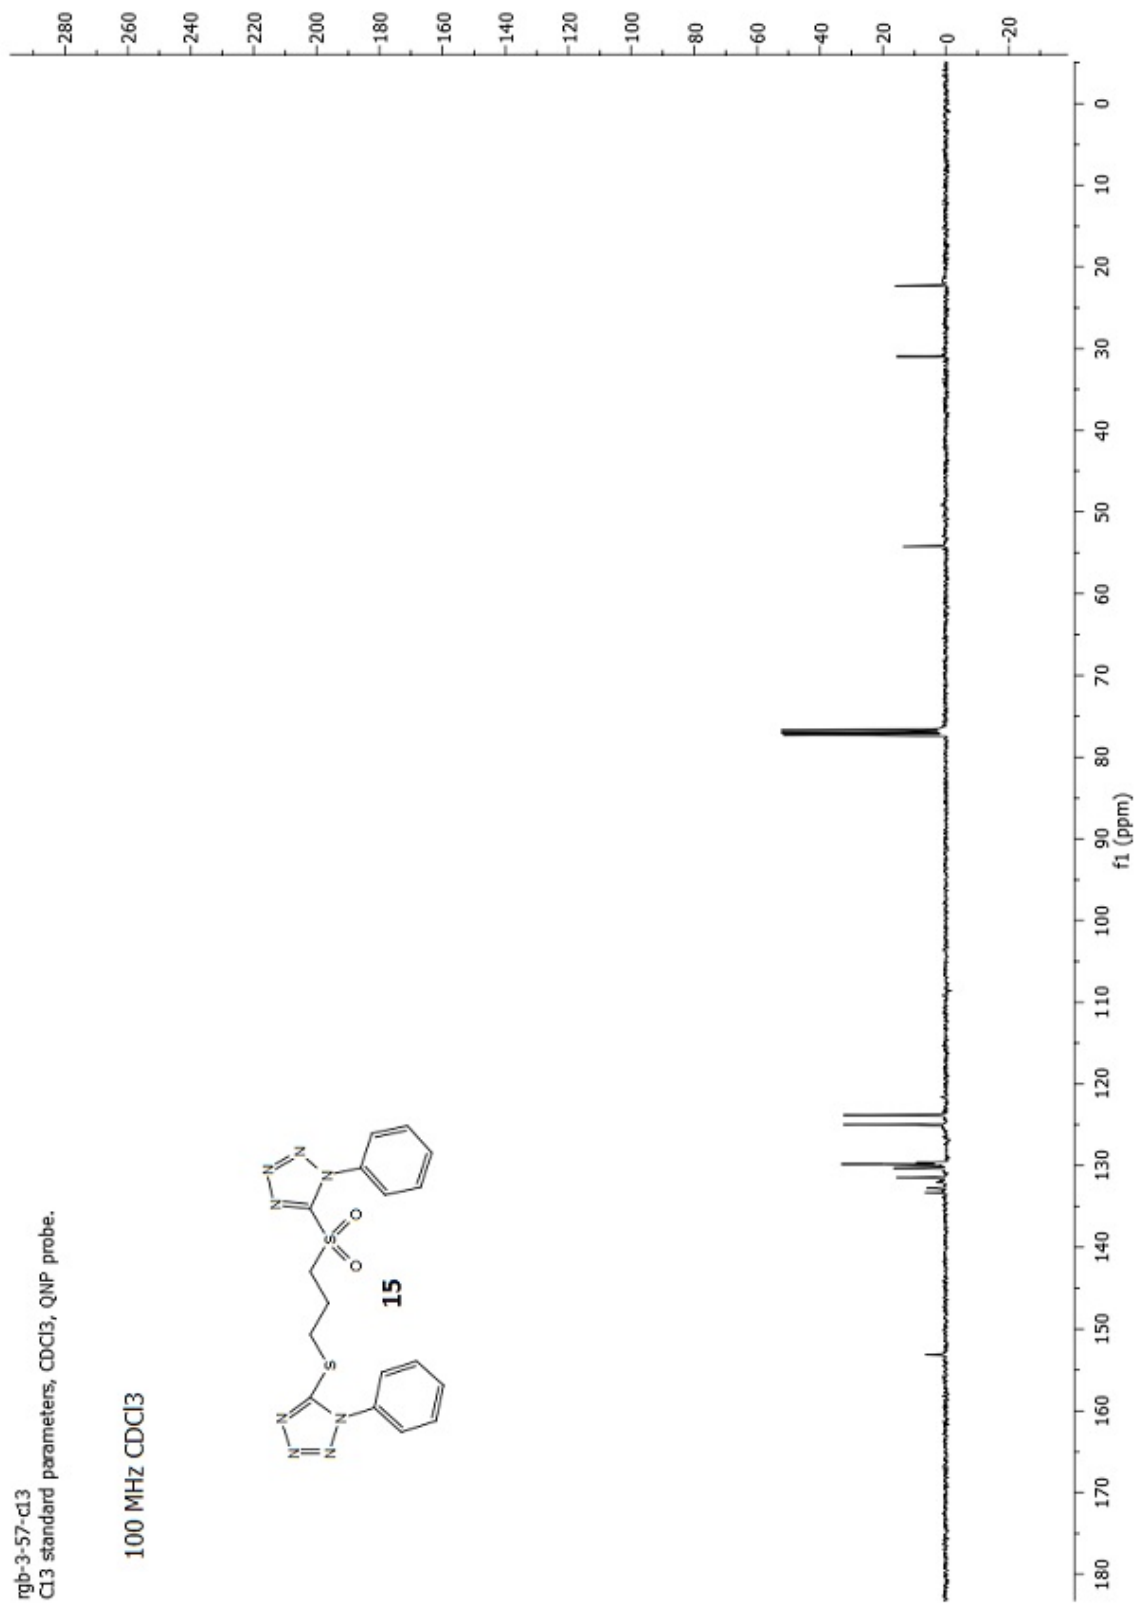

rgb-3-41-h1  
H1 standard parameters, CDCl3, QNP probe.

400 MHz, CDCl3

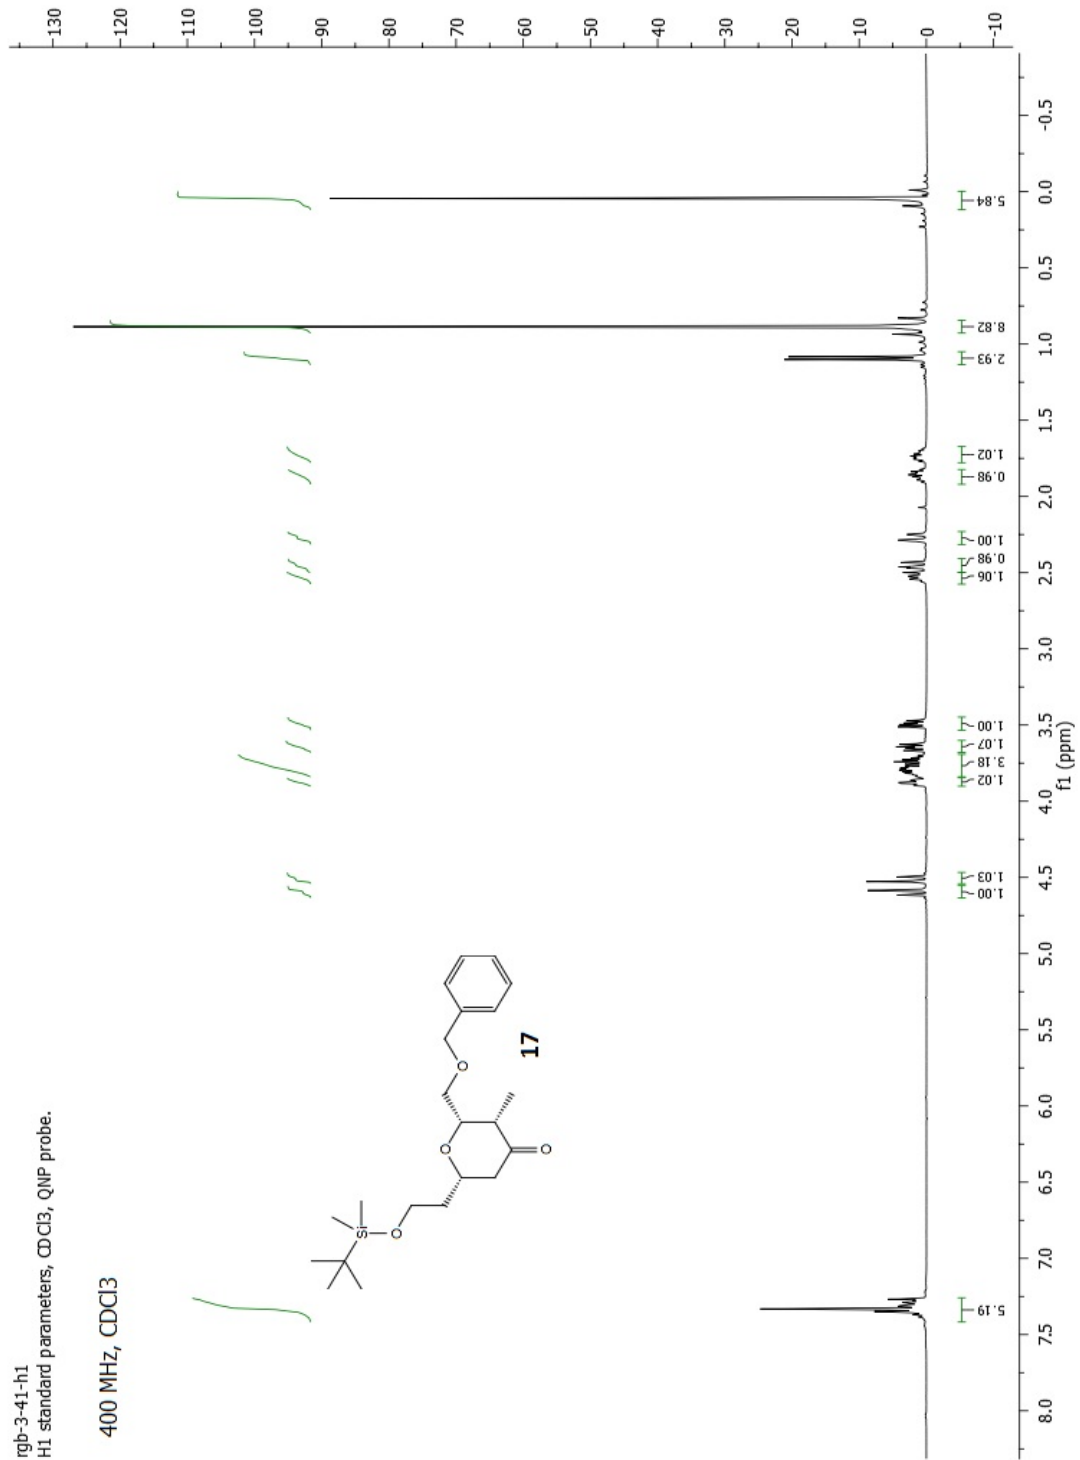

rgb-3-41-cl3  
Cl3 standard parameters, CDCl3, QNP probe.

100 MHz, CDCl3

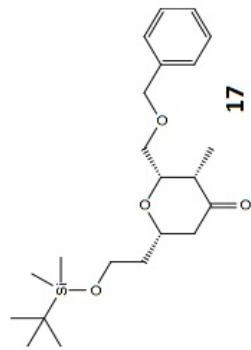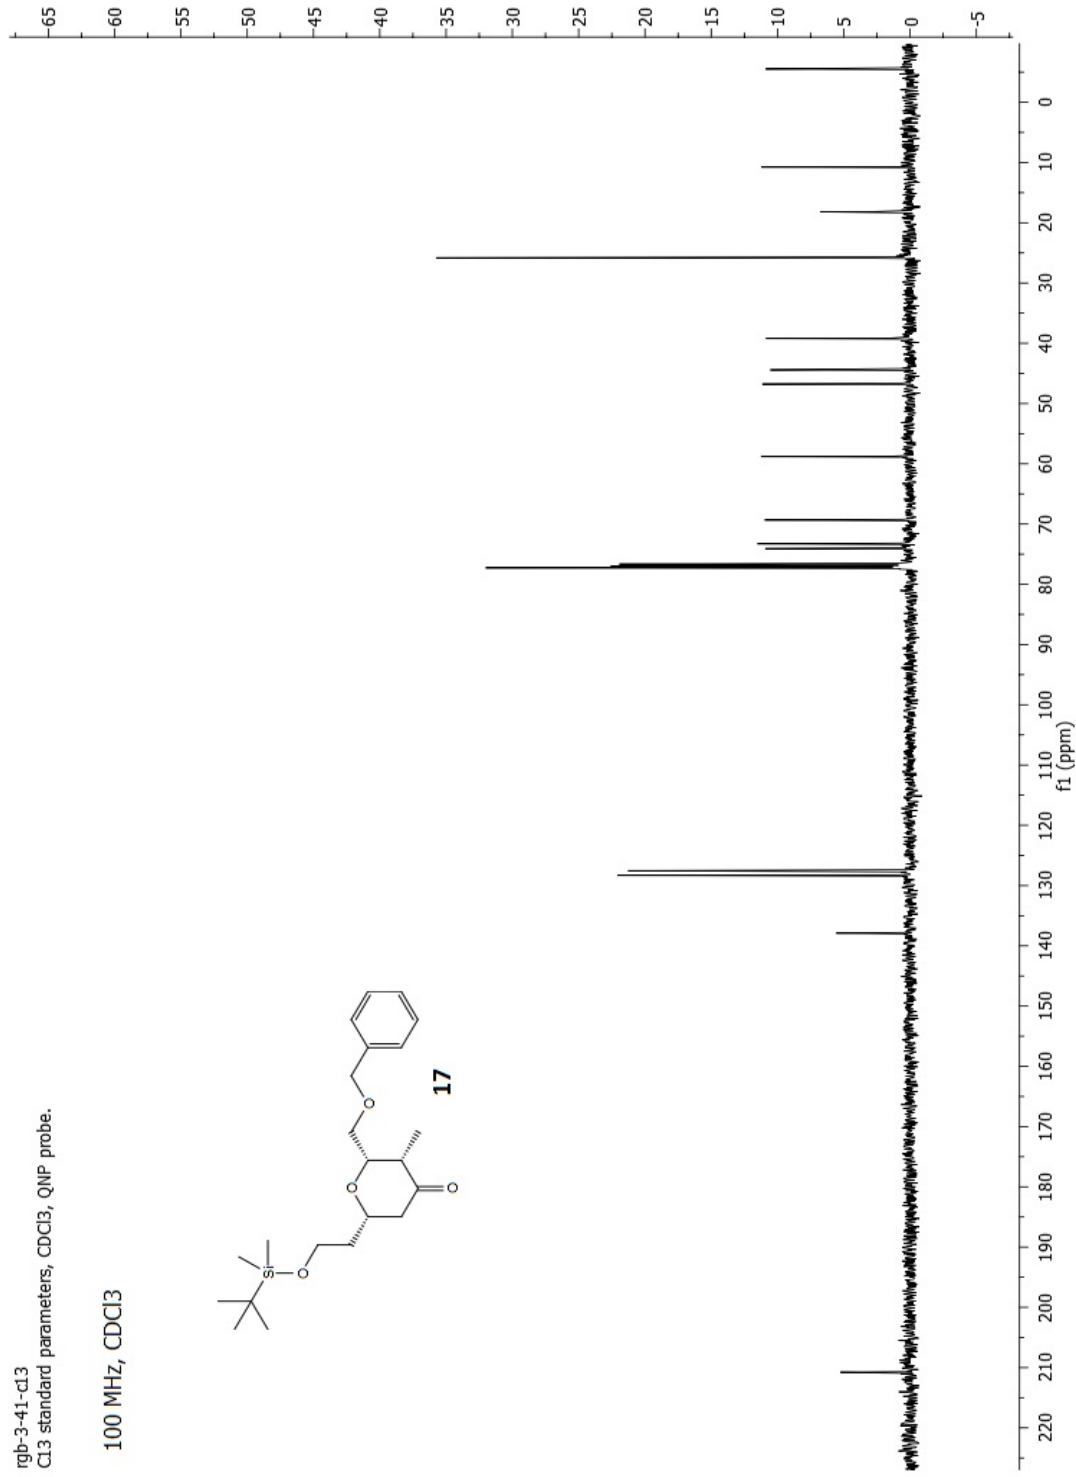

rgb-2-92-2-h1  
H1 standard parameters, CDCl3, QNP probe.

400 MHz, CDCl3

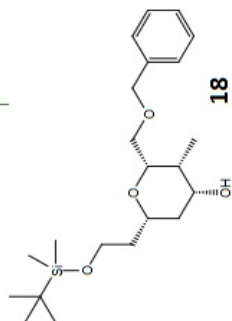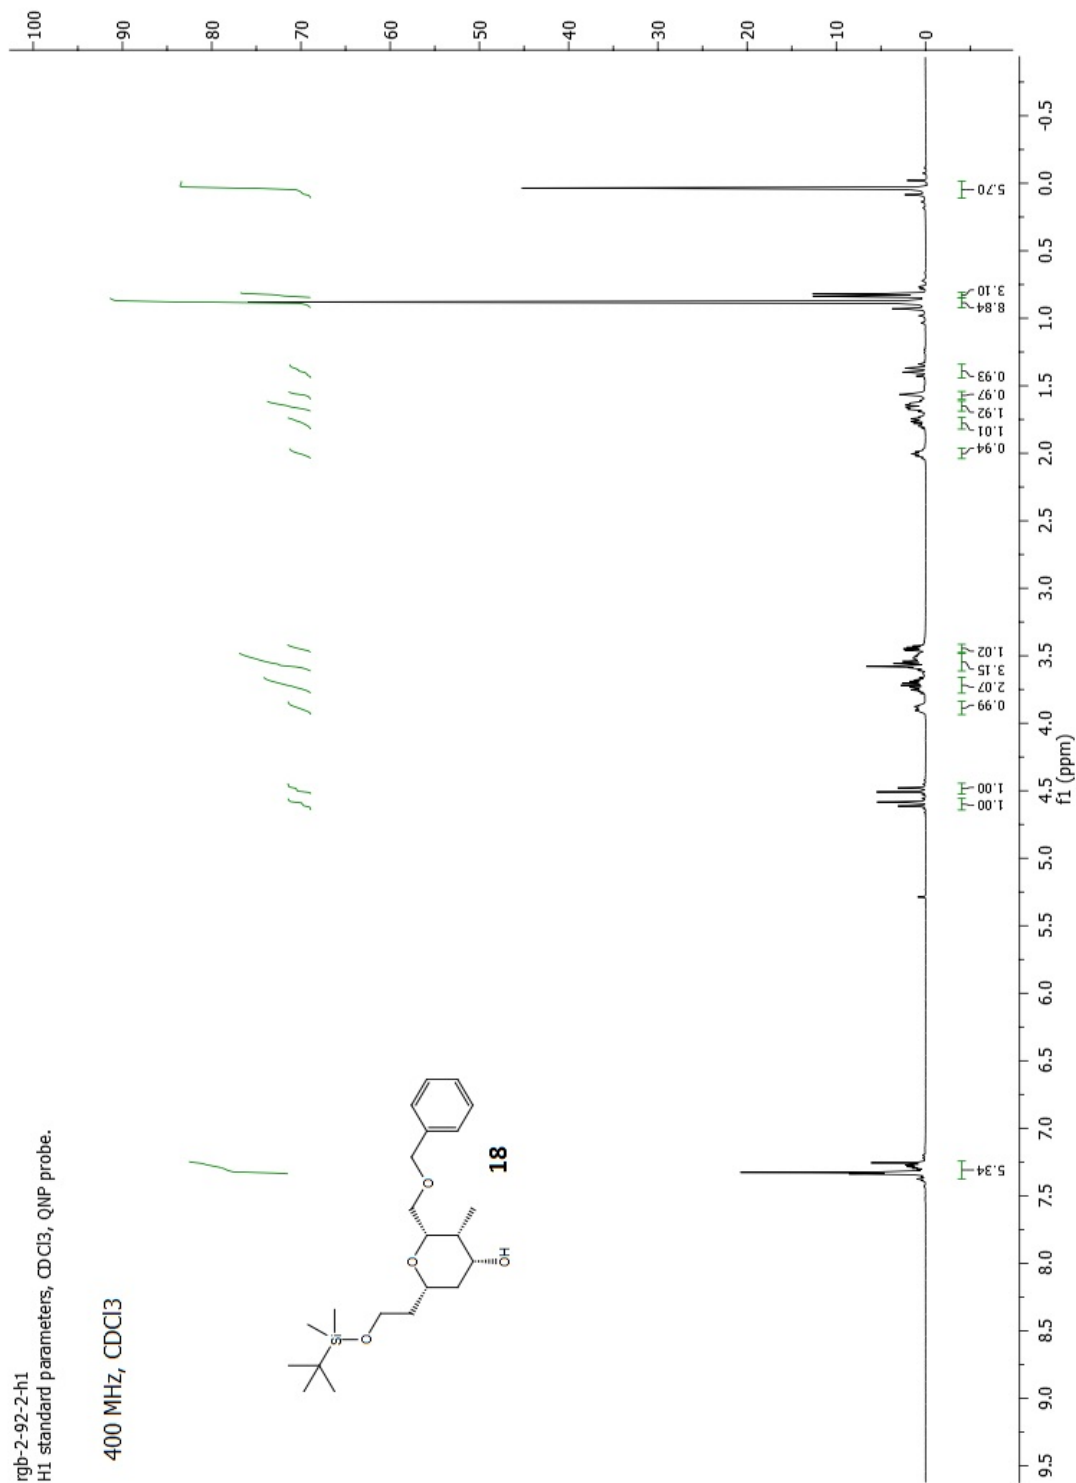

rgb-2-92-2-cl13  
Cl13 standard parameters, CDCl3, QNP probe.

100 MHz, CDCl3

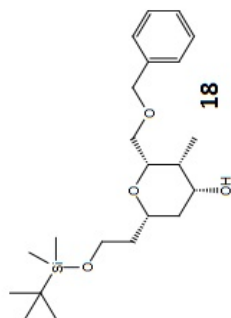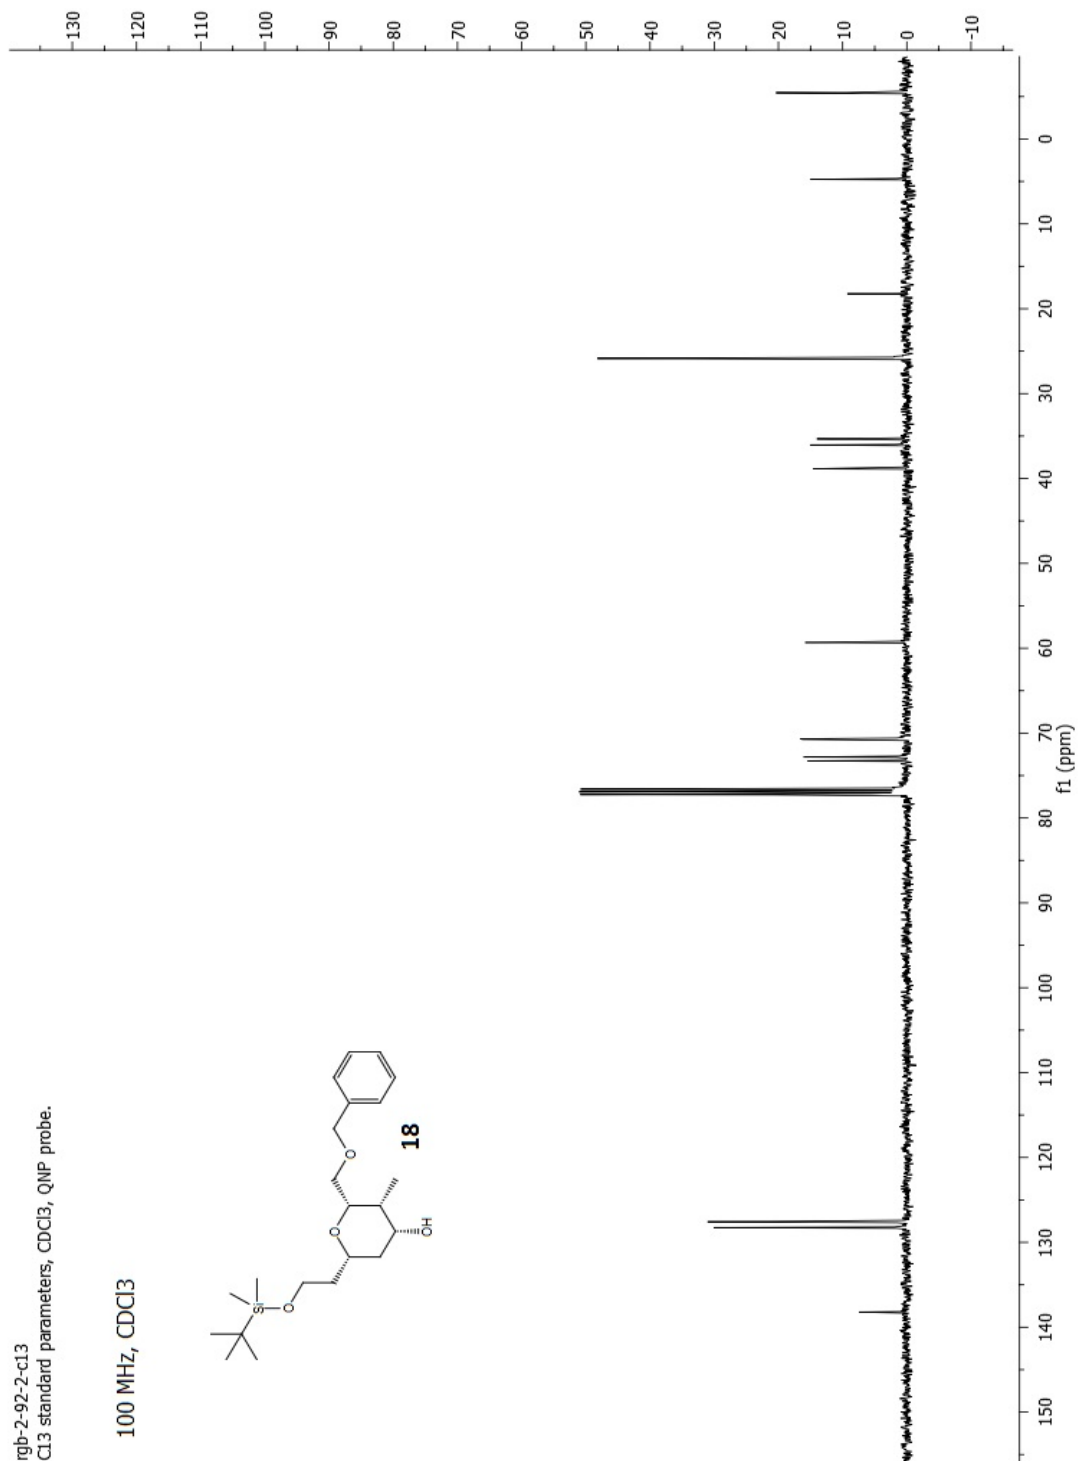

rgb-2-92-1-h1  
H1 standard parameters, CDCl3, QNP probe.

400 MHz, CDCl3

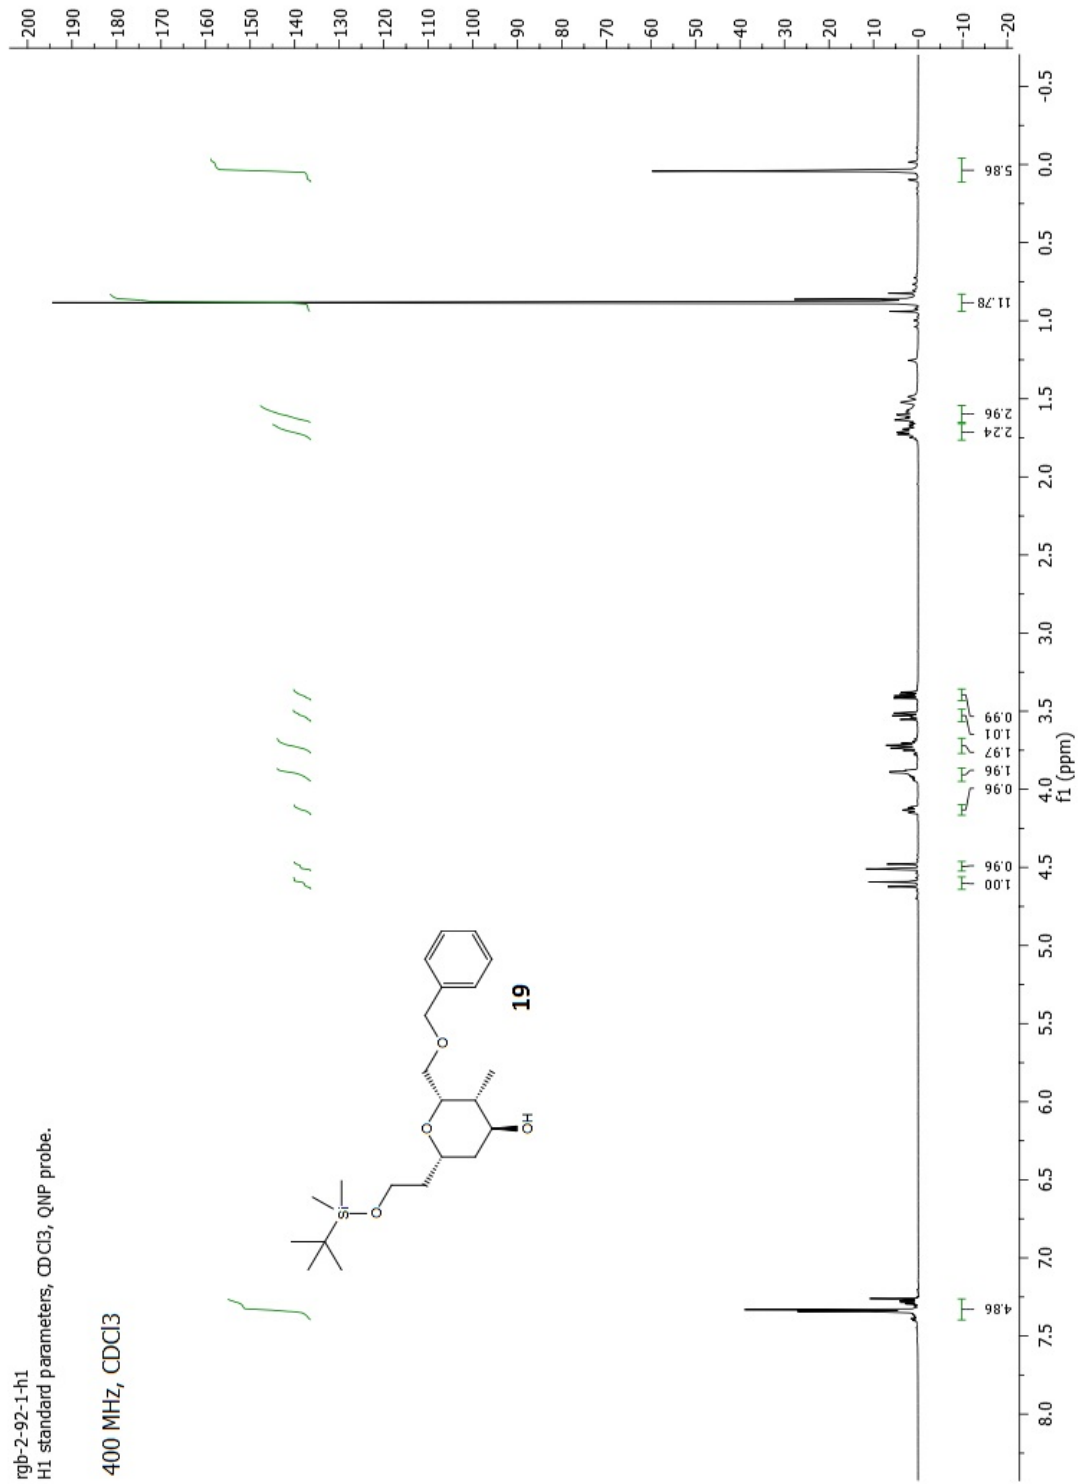

rgb-2-92-1-c13  
C13 standard parameters, CDCl3, QNP probe.

100 MHz, CDCl3

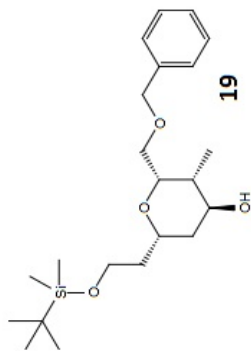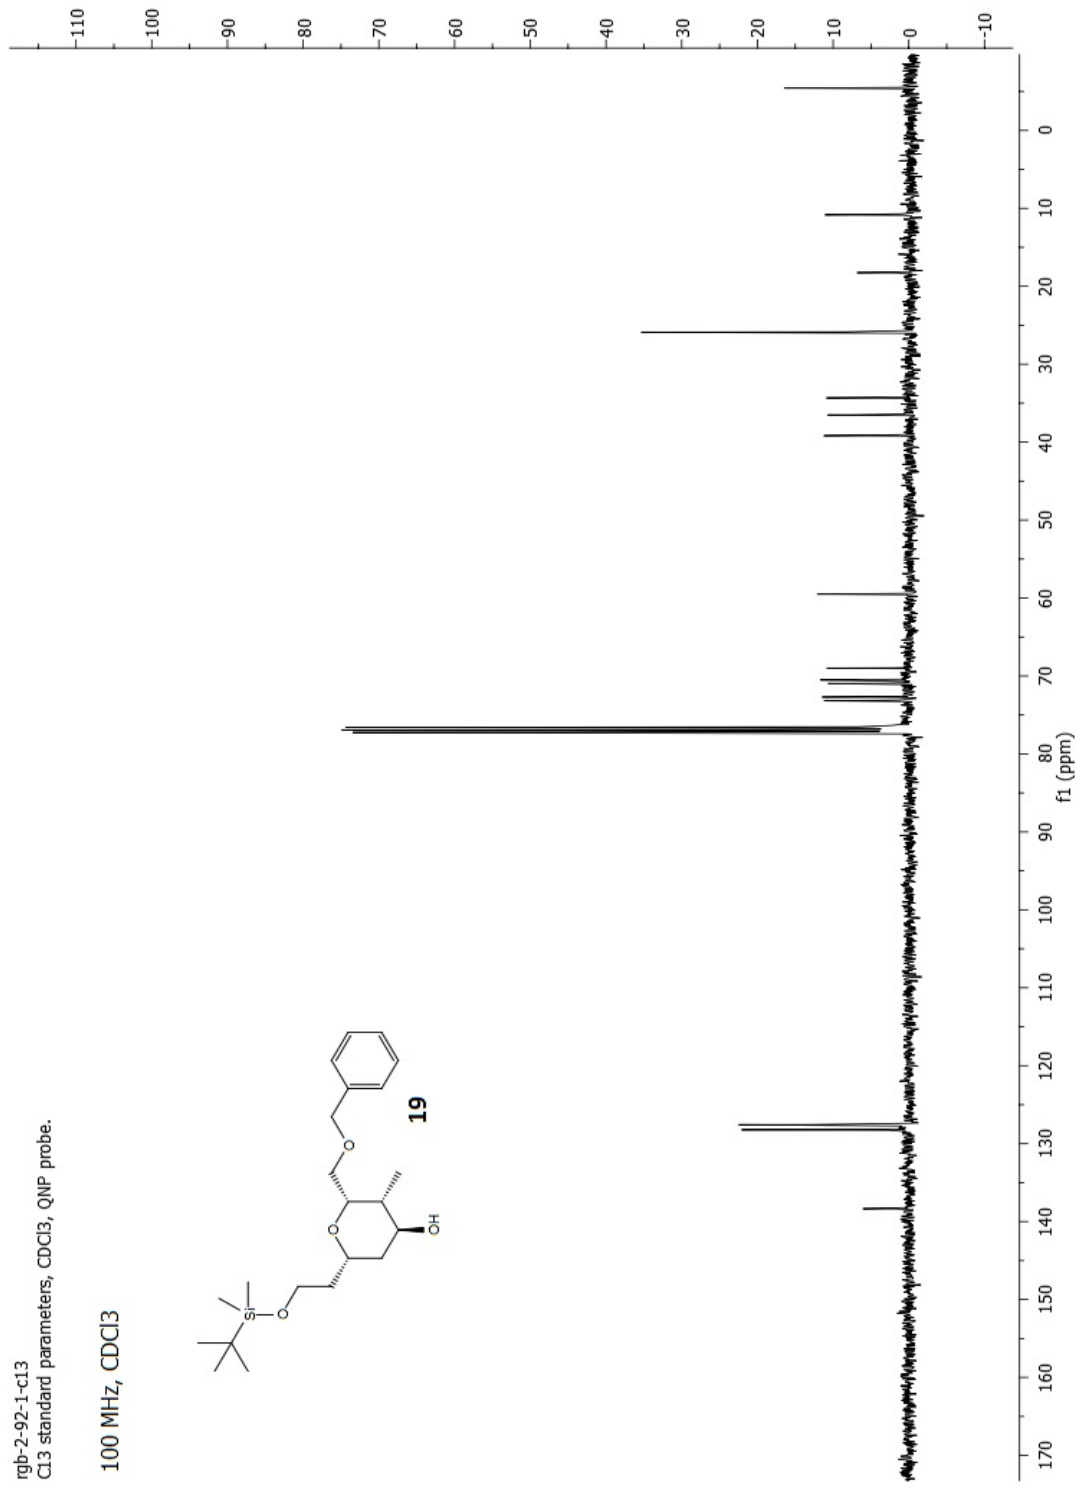



rgb-3-141-h1  
H1 standard parameters, CDCl3, QNP probe.  
400 MHz, CDCl3

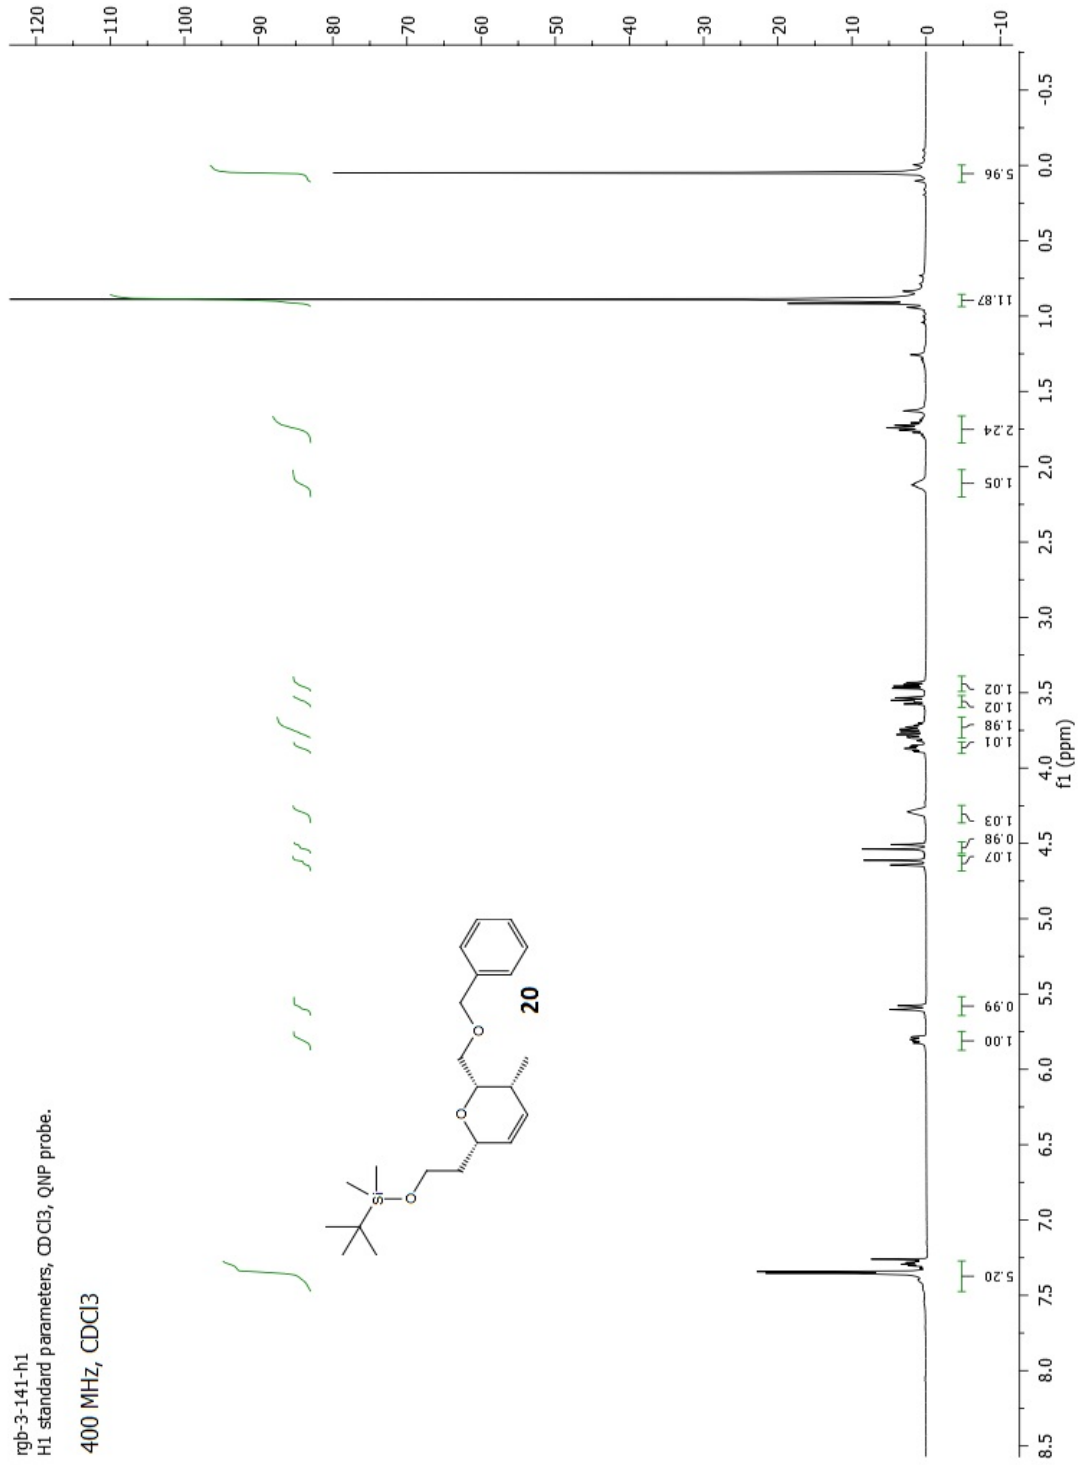

rgb-3-141-cl3  
Cl3 standard parameters, CDCl3, QNP probe.

100 MHz, CDCl3

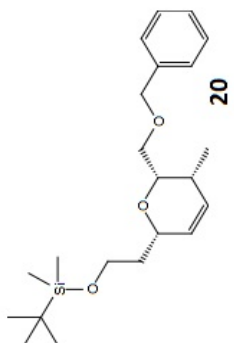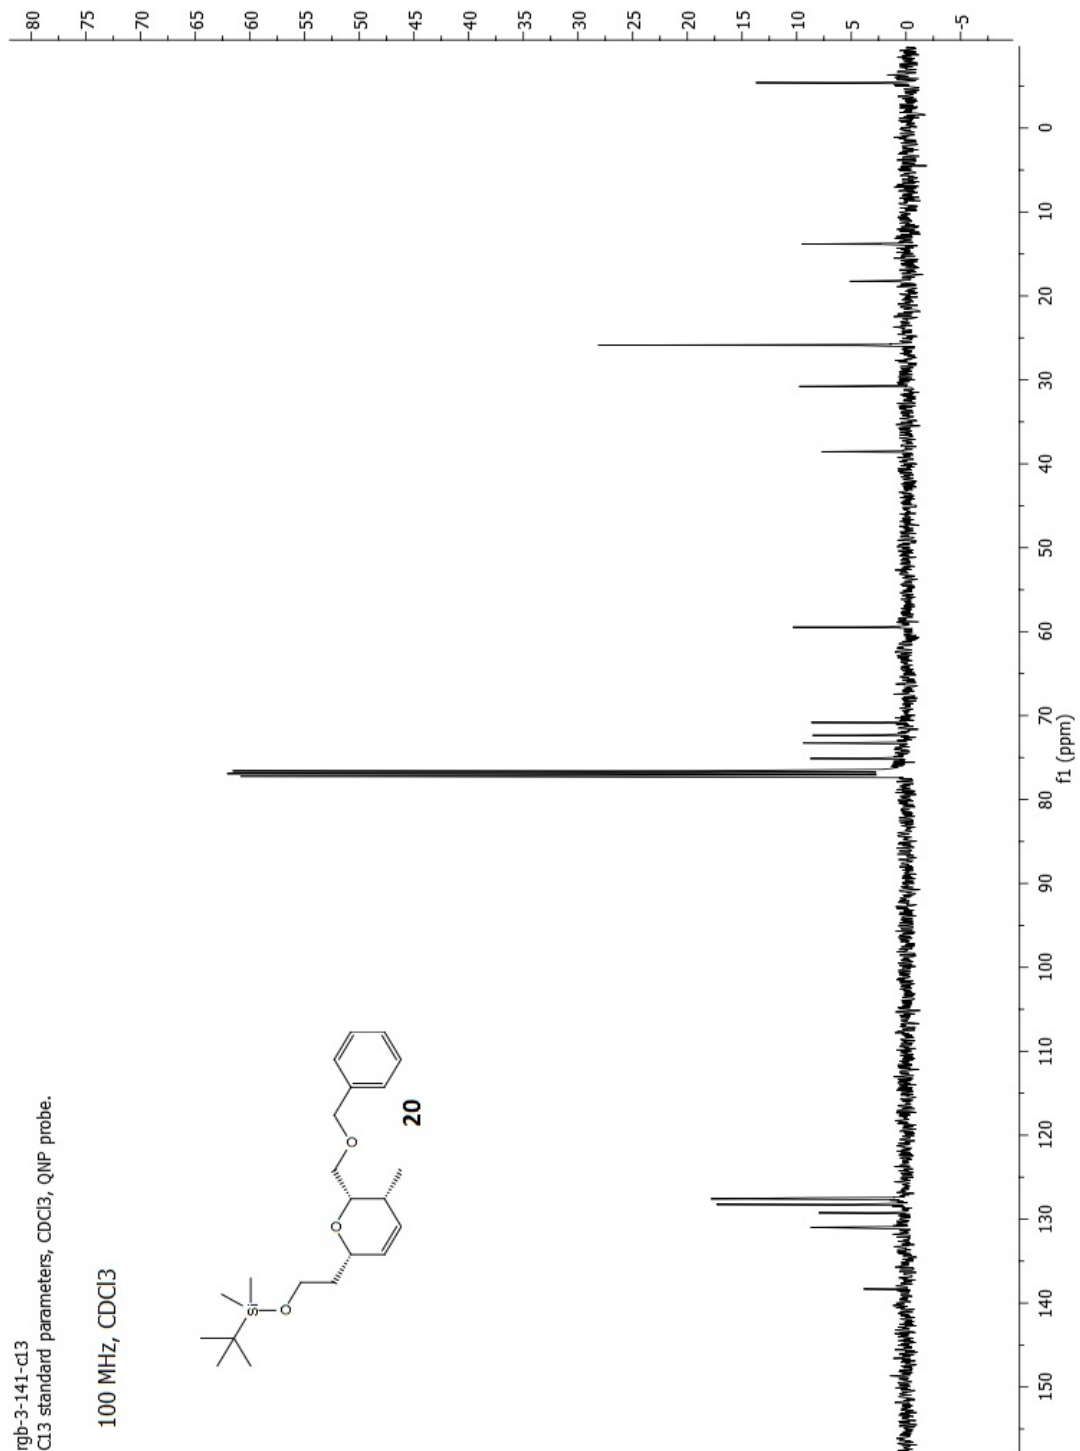

rgb-2-127-h1  
H1 standard parameters, CDCl3, QNP probe.

400 MHz, CDCl3

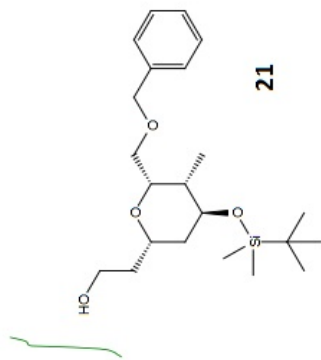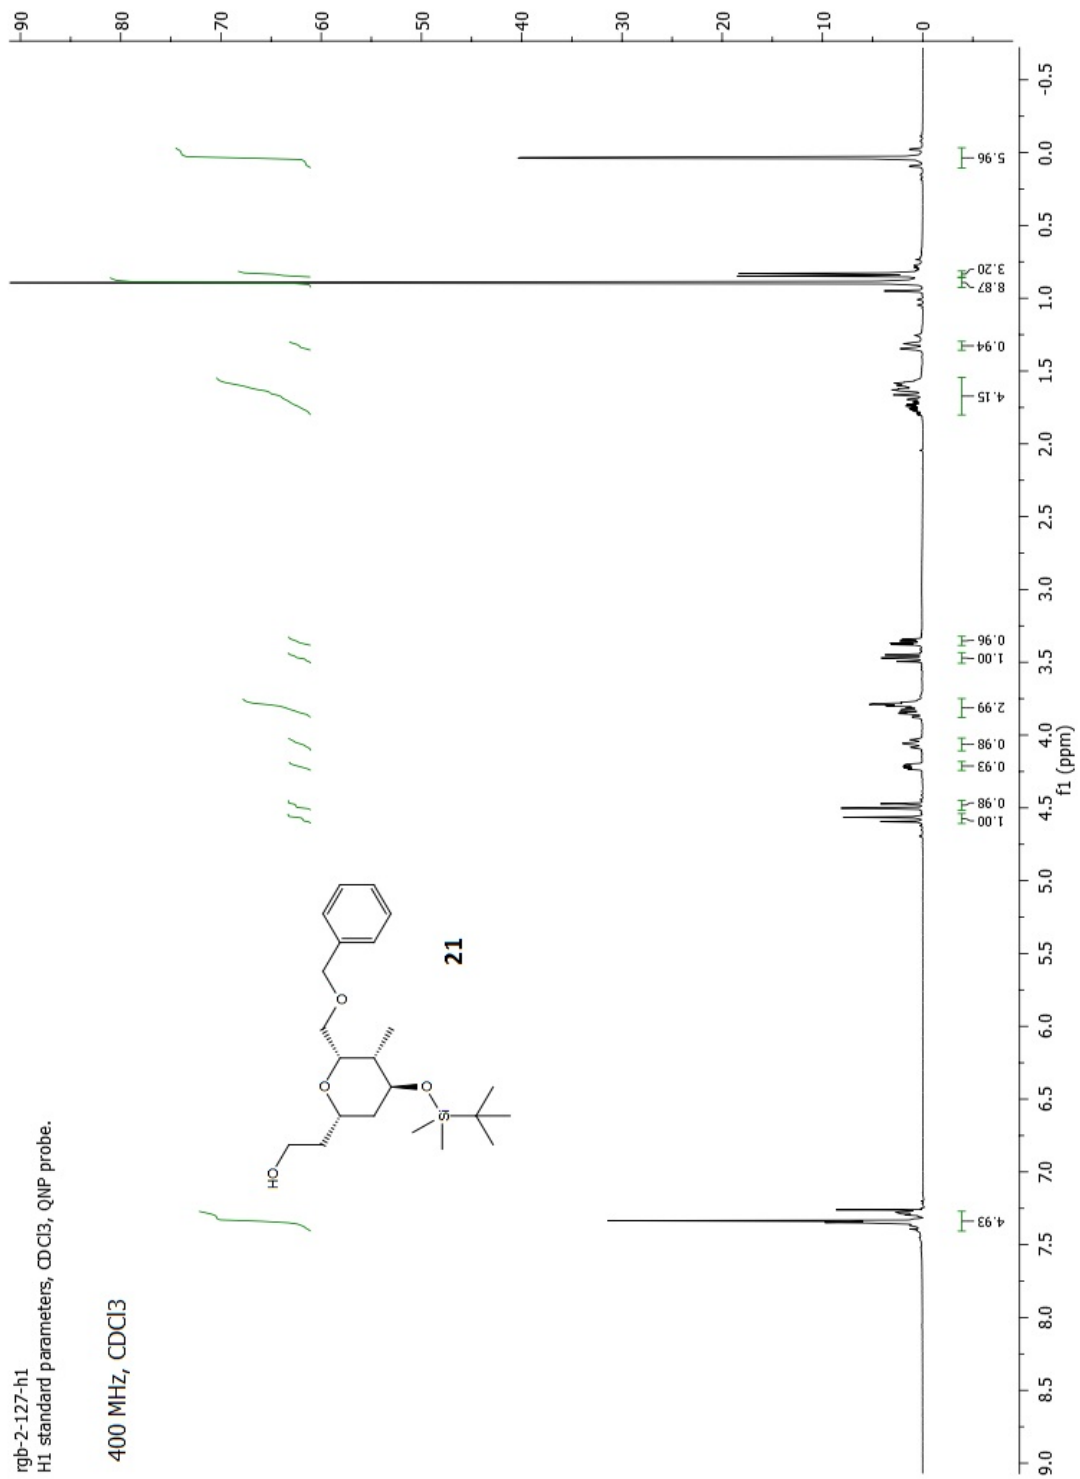

rgb-2-127-cl3  
Cl3 standard parameters, CDCl3, QNP probe.

100 MHz, CDCl3

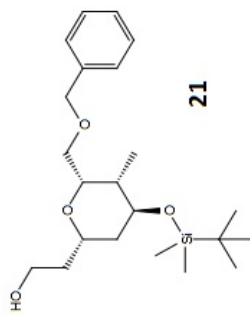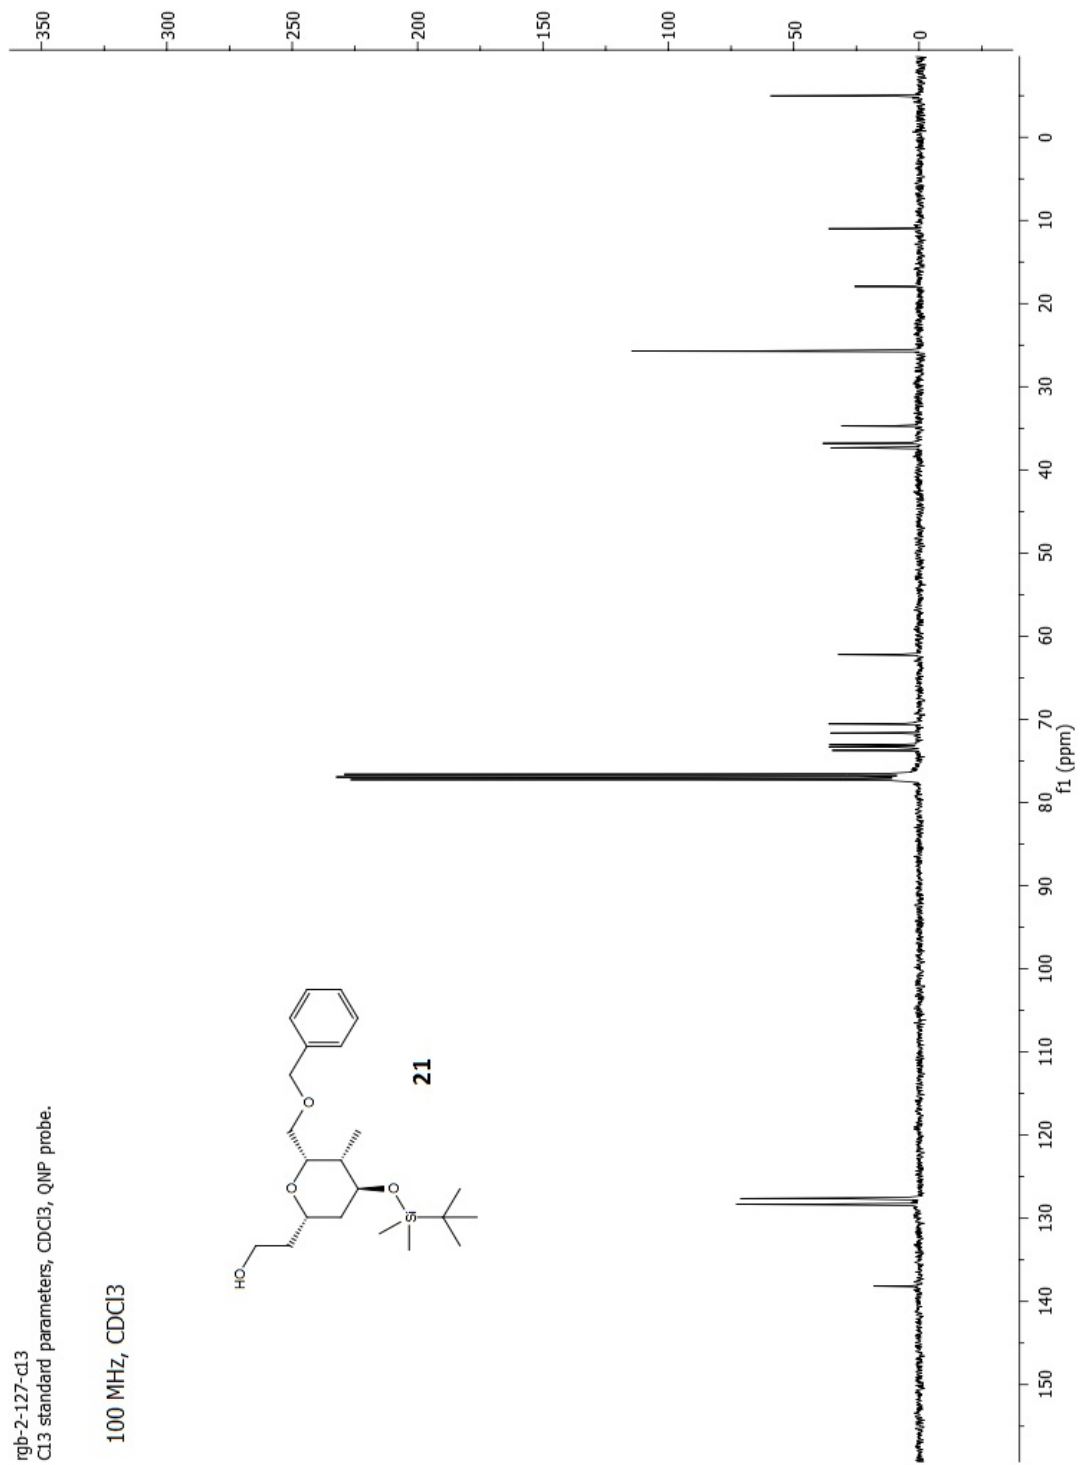

rgb-2-130-h1  
H1 standard parameters, CDCl3, QNP probe.

400 MHz, CDCl3

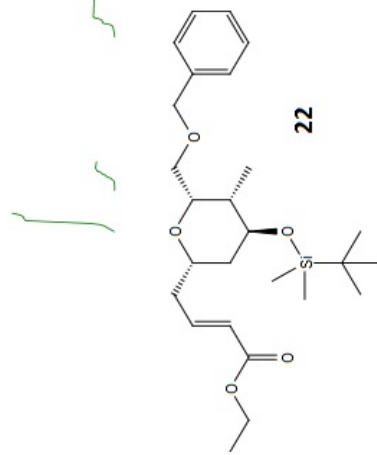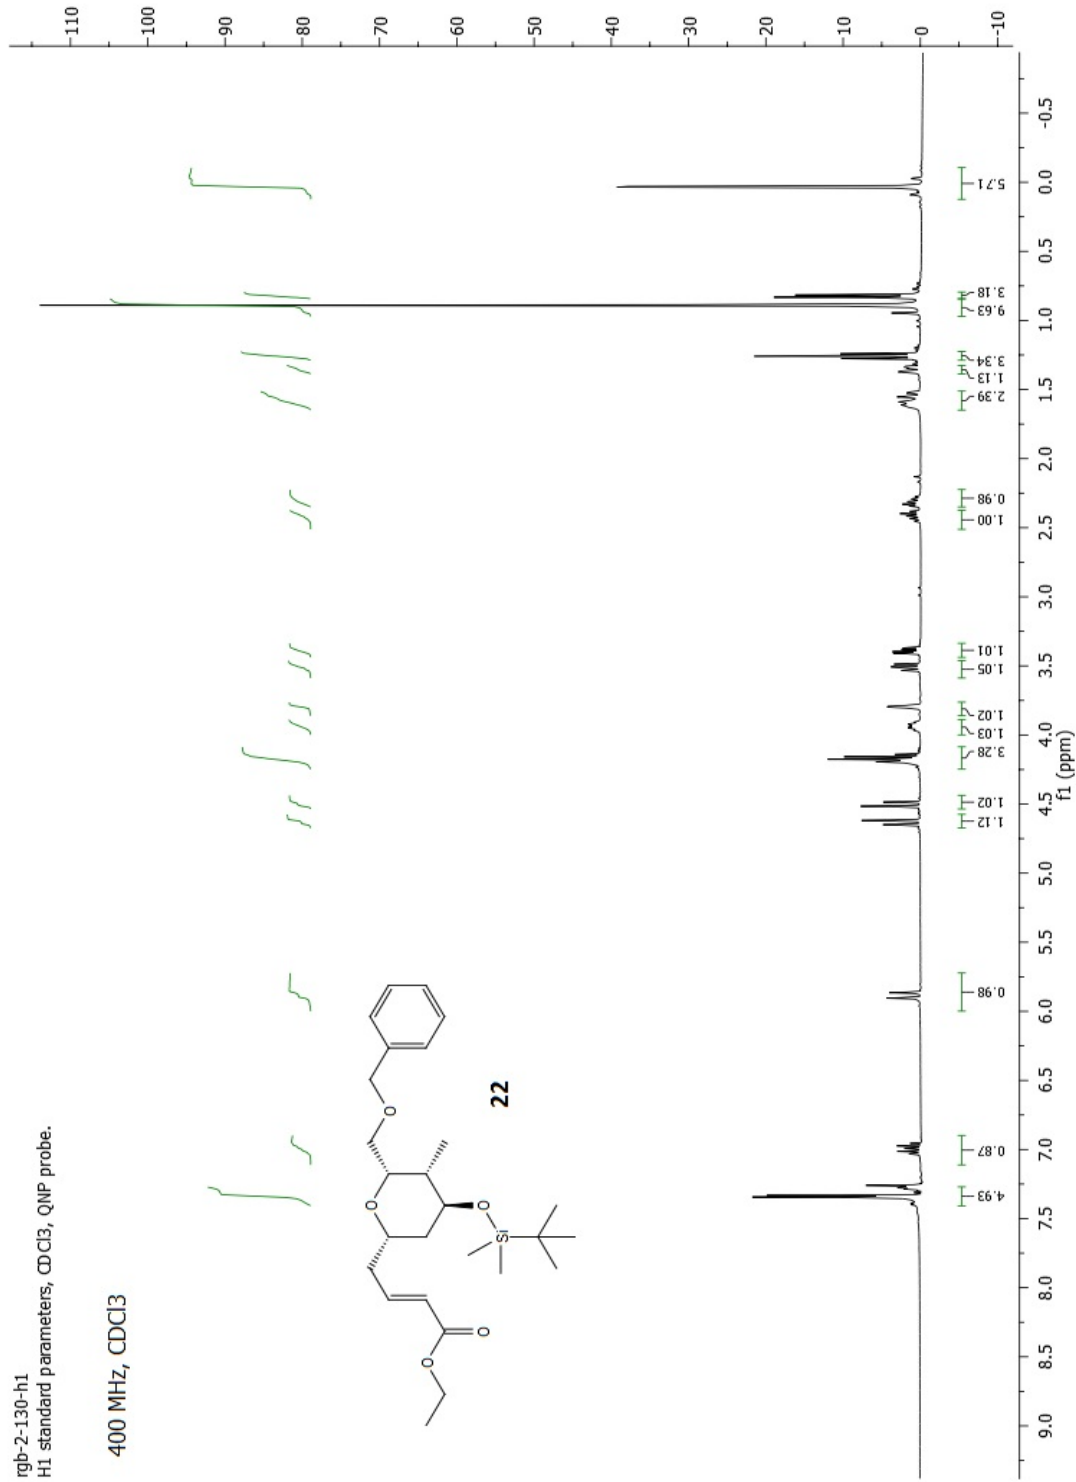

rgb-2-130-cl3  
Cl3 standard parameters, CDCl3, QNP probe.

100 MHz, CDCl3

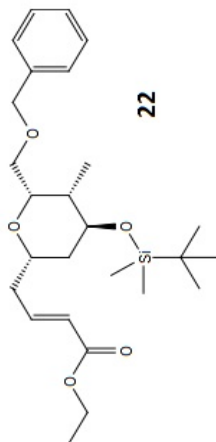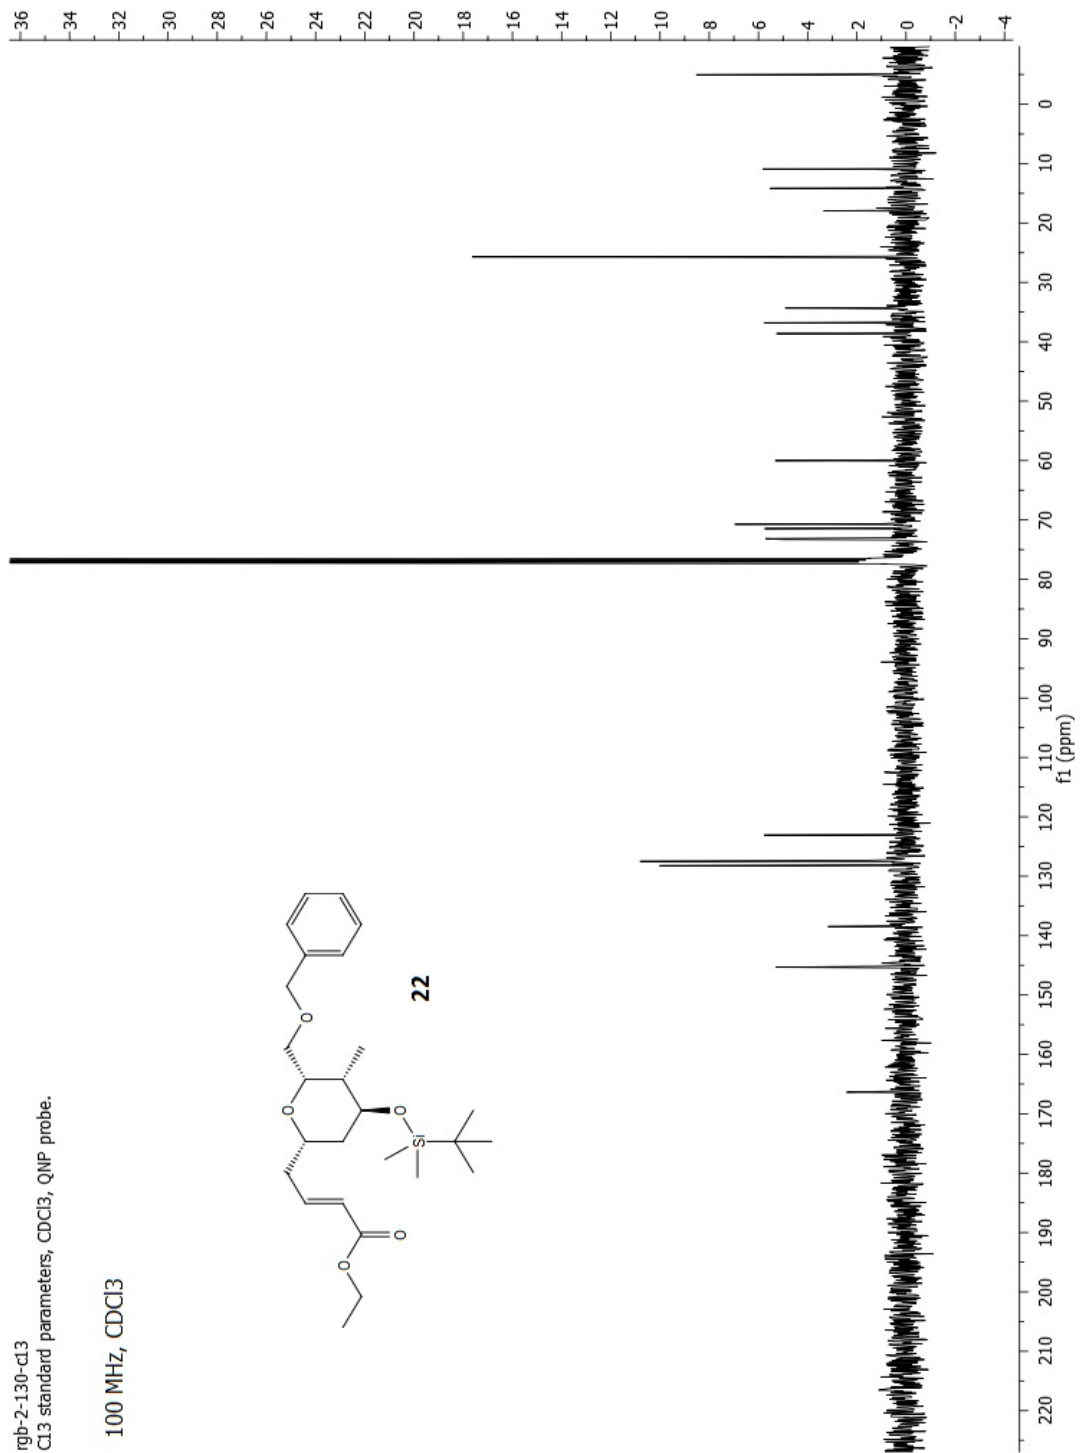

Supplement: NIHMS356842-supplement-1_si_001.pdf [file NIHMS356842-supplement-1_si_001.pdf]
